# Supplementary material for: MiR-150 blunts cardiac dysfunction in mice with cardiomyocyte loss of β1-adrenergic receptor/β-arrestin signaling and controls a unique transcriptome
Source: PubMed Central journal article supplement (PMC9803679; doi:10.1038/s41420-022-01295-9), 2022-12-30

**Figure S9A**

**Bcl2 26 kDa**

Antidody #3498Cell Signaling

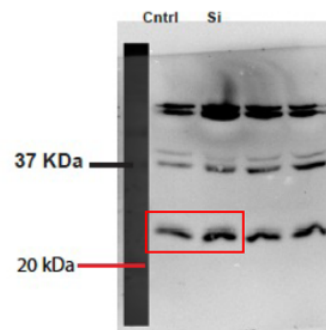

**b-actin 42 kDa**

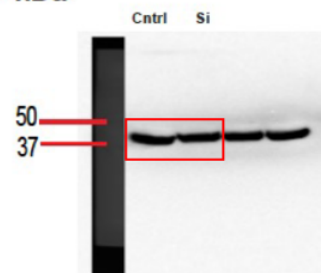

Figure S9B

**Bax 20 kDa**

Antidody #2772 Cell Signaling

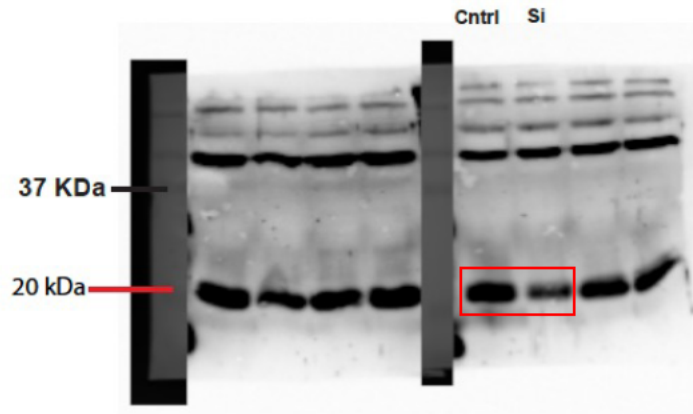

**b-actin 42 kDa**

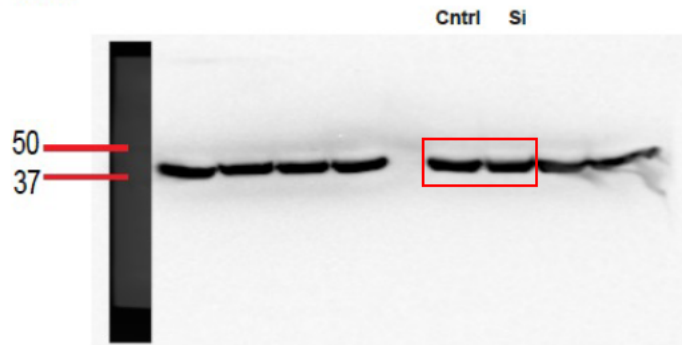

Figure S9C

**P53 53 kDa**

Antidody #sc-126 Santa cruz biotec

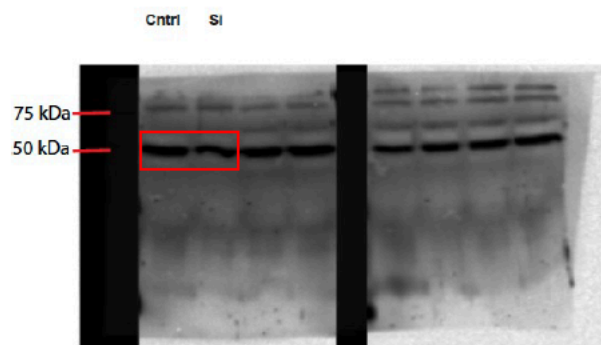

**b-actin 42 kDa**

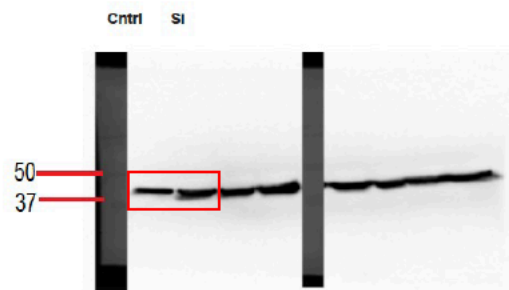

Figure S12A-C

**Gdap111 42 kDa**

Antibody: ThermoFisher Catalog # TA503153

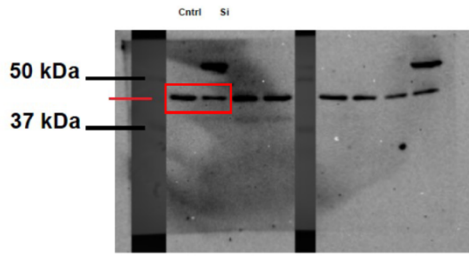

**P53 53 kDa**

Antidody #sc-126 Santa cruz biotec

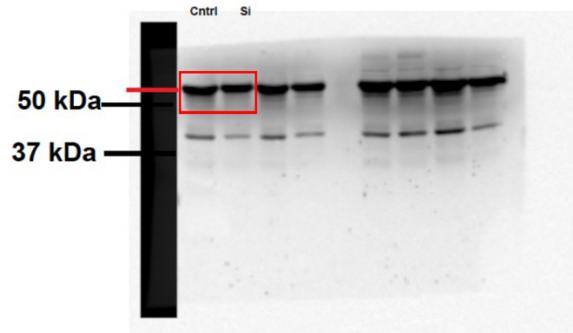

**b-actin 42 kDa**

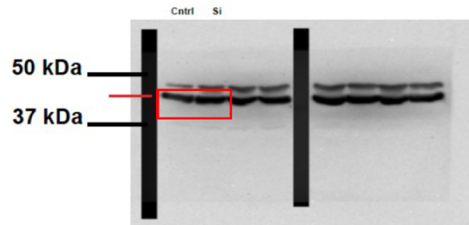

**Figure S12D**

**Cleaved Casp-3 17, 19 kDa**

Antibody: Cell Signaling Cat: Antibody #9661

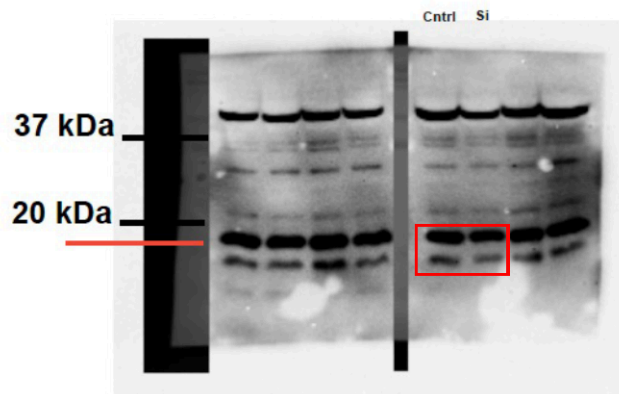

**b-actin 42 kDa**

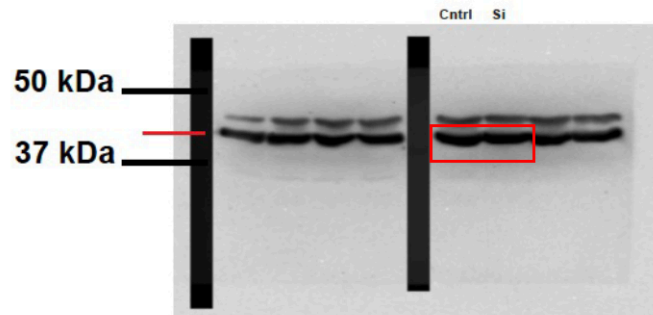

Figure S12E

## Bax 20 kDa

Antidody #2772 Cell Signaling

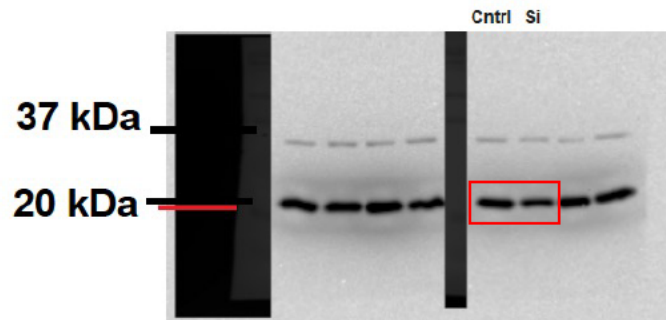

## b-actin 42 kDa

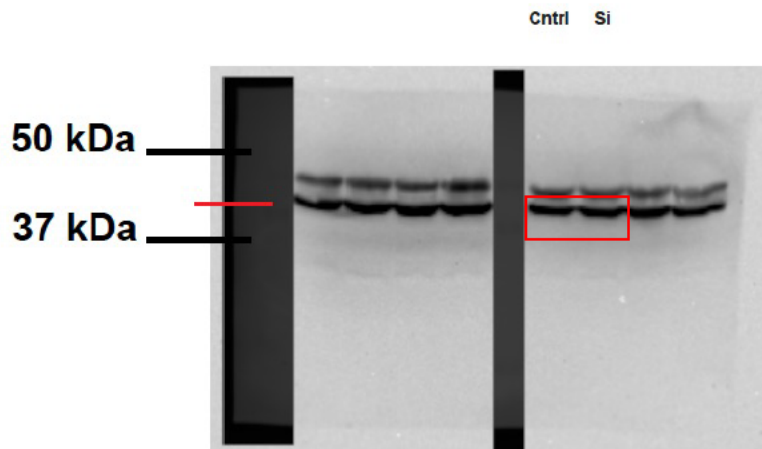

Figure S12F-H

**EGR2 50 kDa**

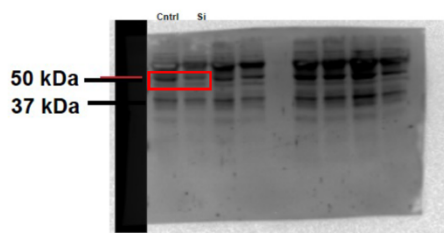

**b-actin 42 kDa**

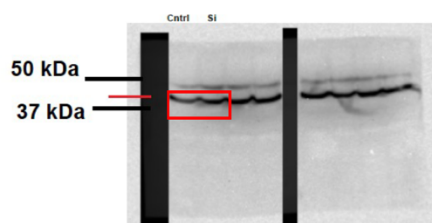

**Bcl 2 26 kDa**

Antibody: Cell Signaling Bcl-2 (D17C4) Rabbit mAb #3498

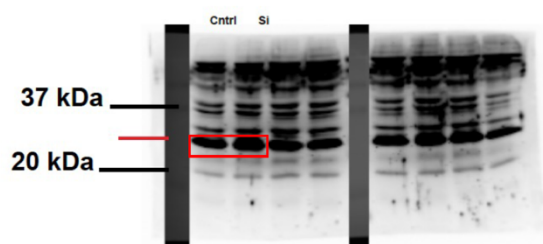

Supplement: 41420_2022_1295_MOESM5_ESM.pdf [file 41420_2022_1295_MOESM5_ESM.pdf]
