# Supplementary material for: MiR-150 blunts cardiac dysfunction in mice with cardiomyocyte loss of β1-adrenergic receptor/β-arrestin signaling and controls a unique transcriptome
Source: PubMed Central journal article supplement (PMC9803679; doi:10.1038/s41420-022-01295-9), 2022-12-30
Supplement: 41420_2022_1295_MOESM1_ESM.pdf [file 41420_2022_1295_MOESM1_ESM.pdf]

## Supplementary Information

- 1
- 2
- 3 Supplementary Results
- 4 Supplementary Materials & Methods
- 5 Supplementary References
- 6 2 Supplementary Tables
- 7 14 Supplementary Figures and Legends
- 8
- 9 Supplementary Spreadsheets
- 10 Table S3\_CircRNAs.xls
- 11 Table S4\_LncRNAs.xls
- 12 Table S5\_Genes.xlsx
- 13 Full and uncropped original blot images
- 14
- 15
- 16
- 17
- 18
- 19
- 20
- 21
- 22
- 23
- 24
- 25
- 26
- 27
- 28
- 29
- 30
- 31
- 32
- 33
- 34
- 35
- 36
- 37
- 38

39  
40  
41  
42  
43  
44  
45  
46  
47  
48  
49  
50  
51  
52  
53  
54  
55  
56  
57  
58

## Supplementary Results

### ***MiR-150 overexpression in mice with CM-specific deficiency in $\beta$ -arrestin-mediated $\beta_1$ AR signaling modulates the expression of a relatively small number of cardiac circular RNAs after chronic catecholamine stimulation***

Among 14,236 mouse circRNAs that we profiled, 14 circRNAs are significantly upregulated, and 3 circRNAs are significantly downregulated (Figure S1A, Figure S2A and Table S3; see Up & Down\_Vehicle DTG vs GRK sheet) in vehicle GRK $\beta_1$ AR/miR-150 DTG compared to vehicle GRK $\beta_1$ AR TG. We also find that 42 circRNAs are significantly upregulated, and 18 circRNAs are significantly downregulated (Figure S1B, Figure S2B and Table S3; see Up & Down\_GRK $\beta_1$ AR ISO vs Vehicle sheet) in ISO GRK $\beta_1$ AR TG compared to vehicle GRK $\beta_1$ AR TG. In addition, 58 circRNAs are significantly upregulated, and 20 circRNAs are significantly downregulated (Figure S1C, Figure S2C and Table S3; see Up & Down\_DTG ISO vs Vehicle sheet) in ISO GRK $\beta_1$ AR/miR-150 DTG compared to vehicle GRK $\beta_1$ AR/miR-150 DTG. Lastly, we observe that 458 circRNAs are significantly upregulated, and 517 circRNAs are significantly downregulated (Figure S1D, Figure S2D and Table S3; see Up & Down\_ISO DTG vs GRK sheet) in ISO GRK $\beta_1$ AR/miR-150 DTG compared to ISO GRK $\beta_1$ AR TG.

### ***MiR-150 overexpression in mice with CM-specific loss of $\beta$ -arrestin-mediated $\beta_1$ AR signaling induces unique cardiac long noncoding RNA signatures post-chronic catecholamine stimulation***

Among 35,923 profiled mouse lncRNAs, 332 lncRNAs are significantly upregulated, and 79 lncRNAs are significantly downregulated (Figure S4A and Table S4; see Up & Down\_Vehicle

64 DTG vs GRK sheet) in vehicle GRK $\beta_1$ AR/miR-150 DTG compared to vehicle GRK $\beta_1$ AR TG. We  
65 also observe that 118 lncRNAs are significantly upregulated, and 67 lncRNAs are significantly  
66 downregulated (Figure S4B and Table S4; see Up & Down\_GRK $\beta_1$ AR ISO vs Vehicle sheet) in  
67 ISO GRK $\beta_1$ AR TG compared to vehicle GRK $\beta_1$ AR TG. In addition, 286 lncRNAs are significantly  
68 upregulated, whereas 364 lncRNAs are significantly downregulated (Figure S4C and Table S4;  
69 see Up & Down\_DTG ISO vs Vehicle sheet) in ISO GRK $\beta_1$ AR/miR-150 DTG compared to vehicle  
70 GRK $\beta_1$ AR/miR-150 DTG. Lastly, we find that 3,036 lncRNAs are significantly upregulated,  
71 whereas 1,848 lncRNAs are significantly downregulated (Figure S4D and Table S4; see Up &  
72 Down\_ISO DTG vs GRK sheet) in ISO GRK $\beta_1$ AR/miR-150 DTG compared to ISO GRK $\beta_1$ AR  
73 TG.

74

75 ***MiR-150 overexpression in mice with CM-specific abrogation of  $\beta$ -arrestin-mediated  $\beta_1$ AR***  
76 ***signaling regulates the expression of a subset of cardiac genes after excessive***  
77 ***catecholamine stimulation***

78 Among 24,881 profiled mouse genes, 143 genes are significantly upregulated, and 75  
79 genes are significantly downregulated (Figure S5A and Table S5; see Up & Down\_Vehicle DTG  
80 vs GRK sheet) in vehicle DTG compared to vehicle GRK $\beta_1$ AR TG. We also observe that 66  
81 genes are significantly upregulated and 37 genes are significantly downregulated (Figure S5B  
82 and Table S5; see Up & Down\_GRK $\beta_1$ AR ISO vs Vehicle sheet) in ISO GRK $\beta_1$ AR TG compared  
83 to vehicle GRK $\beta_1$ AR TG. In addition, 177 genes are significantly upregulated, and 233 genes are  
84 significantly downregulated (Figure S5C and Table S5; see Up & Down\_DTG ISO vs Vehicle  
85 sheet in ISO DTG compared to vehicle DTG) in ISO GRK $\beta_1$ AR/miR-150 DTG compared to  
86 vehicle GRK $\beta_1$ AR/miR-150 DTG. Lastly, we find that 1,878 genes are significantly upregulated,  
87 and 1,453 genes are significantly downregulated (Figure S5D and Table S5; see Up & Down\_ISO  
88 DTG vs GRK sheet) in ISO DTG compared to ISO GRK $\beta_1$ AR TG.

89 To delineate the functional roles of differentially regulated genes in GRK<sup>-</sup>β<sub>1</sub>AR TG and  
90 GRK<sup>-</sup>β<sub>1</sub>AR/miR-150 DTG mice, we then categorized differentially expressed genes via the  
91 signaling pathway classification system of Kyoto Encyclopedia of Genes and Genomes (KEGG).  
92 Our signaling pathway analyses in vehicle DTG compared to vehicle GRK<sup>-</sup>β<sub>1</sub>AR TG demonstrate  
93 that upregulated genes are involved in EGFR tyrosine kinase inhibitor resistance, longevity  
94 regulation pathway, and HIF-1 signaling pathway (Figure S6A). In contrast, downregulated genes  
95 are enriched to Rap1 signaling pathway, regulation of actin cytoskeleton, and Ras signaling  
96 pathway (Figure S7A). We also observe that the top canonical signaling pathways for upregulated  
97 genes in ISO GRK<sup>-</sup>β<sub>1</sub>AR TG compared to vehicle GRK<sup>-</sup>β<sub>1</sub>AR TG include aldosterone synthesis  
98 and secretion, morphine addiction, and chemokine signaling pathway (Figure S6B). In addition,  
99 the expression of genes involved in complement and coagulation cascades, and Hippo signaling  
100 pathway are significantly upregulated (Figure S6C), whereas the expression of genes involved in  
101 ubiquitin- mediated proteolysis are significantly downregulated (Figure S7B) in ISO DTG  
102 compared to vehicle DTG. Lastly, we find that genes involved in arrhythmogenic right ventricular  
103 cardiomyopathy (ARVC), autophagy and dilated cardiomyopathy (DCM) are significantly  
104 increased (Figure S6D) in ISO DTG compared to ISO GRK<sup>-</sup>β<sub>1</sub>AR TG. In contrast, genes involved  
105 in cell cycle, regulation of actin cytoskeleton, and MAPK signaling pathway are significantly  
106 decreased (Figure S7C). Taken together, our gene profiling results suggest that miR-150 in mice  
107 with CM-specific loss of β-arrestin-mediated β<sub>1</sub>AR signaling alters a subset of cardiac  
108 genes/signaling pathways to decrease cardiac dysfunction.

109

110

111

112

113

114

115

116

## 117 **Supplementary Materials & Methods**

118

### 119 **Transthoracic echocardiography**

120

121

122

123

124

125

126

127

128

129

130

### 131 **Histopathological and immunohistochemical analyses**

132

133

134

135

136

137

138

### 139 **Genome-wide circular RNA, long noncoding RNA and mRNA profiling analyses**

140

Left ventricular (LV) performance was assessed by two-dimensional echocardiography using a Vevo 2100 Ultrasound (Visual Sonics) at baseline (pre-surgery) and post-isoproterenol (ISO) at 7 days as previously published [1, 2]. M-mode tracings were used to measure anterior and posterior wall thicknesses at end-diastole and end-systole. Parameters including LV internal diameter (LVID) in either diastole (LVIDd) or systole (LVIDs), end-diastolic volume (EDV), and end-systolic volume (ESV) were obtained. A single operator blinded to mouse genotypes performed echocardiography and data analysis. Fractional shortening (FS) was calculated according to the following formula:  $FS (\%) = [(LVIDd - LVIDs) / LVIDd] \times 100$ . Ejection fraction (EF) was calculated by:  $EF (\%) = [(EDV - ESV) / EDV] \times 100$ . All other LV performance parameters were also obtained as shown in Table S1-2.

Morphometric analyses of heart size and weights were performed as we reported previously [1-3]. Histopathological analyses of myocardial tissues such as fibrosis by Masson's trichrome staining were conducted as previously described [4, 5]. For gross histological assessment, heart sections were stained with hematoxylin and eosin (H&E). Cardiac sections were also stained for TUNEL to assess apoptosis using *In Situ* Cell Death Detection Kit (Sigma-Aldrich) as we published [6].

Total RNAs from 12 independent mouse left ventricles (3 vehicle GRK<sup>-</sup>β<sub>1</sub>AR TG, 3 vehicle

141 GRK<sup>-</sup>β<sub>1</sub>AR;miR-150 DTG, 3 ISO GRK<sup>-</sup>β<sub>1</sub>AR TG and 3 ISO GRK<sup>-</sup>β<sub>1</sub>AR;miR-150 DTG samples)  
142 were prepared as published [7]. RNA quantity and quality were assessed by the Synergy LX FA  
143 Multi-Mode Microplate Reader (BioTek Instruments). For circular RNAs (circRNAs), total RNAs  
144 were digested with Rnase R (Epicentre, Inc.) to remove linear RNAs and enrich circular RNAs.  
145 The DNA microarray experiments were then performed using the Mouse Circular RNA Microarray  
146 v2.0 (8 x 15K, Arraystar Inc) designed for the global profiling of 14,236 circular RNAs (circRNAs),  
147 as well as the Mouse LncRNA Microarray v3.0 (8 x 60K, Arraystar Inc) designed for the global  
148 profiling of 35,923 long noncoding RNAs (lncRNAs) and 24,881 protein-coding transcripts as  
149 previously described [7-11]. Fifteen positive probes for housekeeping genes and 20 negative  
150 probes were also included in the array as hybridization quality controls.

151

## 152 **Labeling and array hybridization**

153 RNA labeling and array hybridization were conducted according to the One-Color  
154 Microarray-Based Gene Expression Analysis protocol (Agilent Technology) as previously  
155 described [7, 12]. The Quick Amp Labeling Kit (Agilent Technologies) was used for sample  
156 labeling, and hybridization was performed in the SureHyb Hybridization Chamber (Agilent  
157 Technologies). Briefly, mRNAs were purified by using mRNA-ONLY™ Eukaryotic mRNA Isolation  
158 Kit (Epicentre Biotechnologies). Each sample was then amplified and transcribed into fluorescent  
159 cRNAs by utilizing a random priming method (Arraystar Super RNA Labeling Kit; Arraystar Inc).  
160 Next, the labeled cRNAs were purified by RNeasy Mini Kit (Qiagen). The concentration and  
161 specific activity of the labeled cRNAs (pmol Cy3/μg cRNA) were measured by NanoDrop ND-  
162 1000. 1 μg of each labeled cRNA was then fragmented by adding 5 μl 10 × Blocking Agent and 1  
163 μl of 25 × Fragmentation Buffer. Then, the mixture was heated at 60°C for 30 minutes and 25 μl  
164 of 2 × Hybridization buffer was added to dilute the labeled cRNA. Lastly, 50 μl of hybridization  
165 solution was dispensed into the gasket slide and assembled into microarray slides. The slides  
166 were then incubated for 17 hours at 65°C in a hybridization oven (Agilent Technologies). The

167 hybridized arrays were washed, fixed and scanned by using the DNA Microarray Scanner  
168 G2505C (Agilent Technologies).

169

### 170 **Analysis of microarray dataset**

171 The Feature Extraction software version 11.0.1.1 (Agilent Technologies) was used to  
172 analyze acquired array images as described [7]. We performed more robust quantile  
173 normalization across all 12 samples than normalizing with one/some control probes (*i.e.*, the  
174 entire intensity distributions were normalized across the arrays, not just some reference points).  
175 The subsequent data processing was then performed using the R software limma package and  
176 the GeneSpring GX version 12.1 software package (Agilent Technologies). We then chose  
177 transcripts, in which at least 6 out of 12 samples exhibited flags in Present or Marginal, for further  
178 data analyses. We identified differentially expressed (DE) transcripts with statistical significance  
179 through Volcano Plot filtering between groups. For annotation for circRNA/miR interaction, the  
180 circRNA/miR interaction was predicted with Arraystar's home-made miR target prediction  
181 software. For protein-coding genes, we performed the pathway analysis for DE genes to identify  
182 the biological pathway by utilizing the GeneSpring Software GX version 12.1 (Agilent  
183 Technologies) and the latest Kyoto Encyclopedia of Genes and Genomes (KEGG;  
184 <http://www.genome.jp/kegg>) database. We used Fisher's exact test to calculate the *P* values of  
185 the Pathway ID and converted them to enrichment score by negative log<sub>10</sub> transformation.

186

### 187 **Immunoblotting, antibody, and detection**

188 Cardiomyocytes were washed once with 1X PBS, solubilized in 1ml of lysis buffer (5mM  
189 HEPES, 250mM NaCl, 10% glycerol, 0.5% Nonidet P-40, 2mM EDTA, and protease inhibitors)  
190 for whole cell lysates as previously described [13]. Lysate samples were resolved by SDS-PAGE  
191 and transferred to PVDF (Bio-Rad) for immunoblotting. BCL-2 (3498, Rabbit, Cell Signaling), BAX  
192 (2772, Rabbit, Cell Signaling), p53 (sc-126, mouse, Santa Cruz), CLEAVED CASPASE-3 (9661,

193 Rabbit, Cell Signaling], EGR2 (AV100880, Rabbit, Sigma-Aldrich), GDAP1L1 (TA503153, Mouse,  
194 Thermo Fischer) and  $\beta$ -ACTIN (A5441, mouse, Sigma-Aldrich) primary antibodies were  
195 purchased and used at dilutions of 1:1,000 each. Detection was carried out using ECL (Amersham  
196 Biosciences).

197

### 198 ***In silico* miR target prediction analyses and luciferase reporter-based miR-150 targeting** 199 **assays**

200 We used several prediction algorithms including miRwalk, miRanda, DIANA-microT-CDS,  
201 and Targetscan [14-16]. Each of these algorithms predicts hundreds of possible targets for miR-  
202 150. The mouse *Gm41664* and human *GDAP1L1* regions with the miR-150 binding site were  
203 cloned into the pmirGLO Dual-Luciferase miR Target Expression Vector (E1130, Promega). The  
204 following oligonucleotide pairs were designed, annealed, and ligated into the pmirGLO Vector to  
205 generate WT and mutant luciferase constructs. *Gm41664*: WT forward primer, 5'-  
206 AACTAGCGGCCGCTAGTACATATCTGAAGTGTT**GGGAG**T-3', WT reverse primer, 5'-  
207 CTAGAA**CTCCCA**CAACTTCAGATATGTACTAGCGGCCGCTAGTTT-3', mutant forward primer,  
208 5'-AACTAGCGGCCGCTAGTACATATCTGAAGTGTT**TAAG**T-3', and mutant reverse primer,  
209 5'-CTAGAA**CTTAA**CAACTTCAGATATGTACTAGCGGCCGCTAGTTT-3'. *GAP1L1*: WT forward  
210 primer, 5' AACTAGCGGCCGCTAGTATAATCCCAGTGCTTT**GGGAG**AT-3', WT reverse  
211 primer, 5'-CTAGAT**CTCCCA**AAGCACTGGGATTATACTAGCGGCCGCTAGTTT-3', mutant  
212 forward primer, 5'-AACTAGCGGCCGCTAGTATAATCCCAGTGCTTT**TAAG**AT-3', and mutant  
213 reverse primer, 5'-CTAGAT**CTTAA**AAGCACTGGGATTATACTAGCGGCCGCTAGTTT-3'.

214 Inserts and insertion sites were confirmed by ~140bp inserts when digested with NotI due  
215 to NotI sites in the vector and oligonucleotides, followed by sequencing for all plasmids. AC16  
216 cells were transfected in 96-well plates with 0.1  $\mu$ g of one of the luciferase plasmids along with  
217 either 50nM of miR mimic control or miR-150 mimic (MC10070; Life Technologies). At 72 hours  
218 after transfection, freshly collected cells were used for luciferase activities in Firefly and Renilla



219 buffers measured by Dual-Glo Luciferase Assay System (E2920, Promega) with the Synergy LX  
220 FA Multi-Mode Microplate Reader (BioTek Instruments) as described [1, 3].

221

222

223

224

225

226

227

228

229

230

231

232

233

234

235

236

237

238

239

240

241

242

243

244

245

246

247

248 **Supplementary References**

- 249 1. Bayoumi AS, Teoh JP, Aonuma T, Yuan Z, Ruan X, Tang Y, et al. MicroRNA-532 protects  
250 the heart in acute myocardial infarction, and represses prss23, a positive regulator of  
251 endothelial-to-mesenchymal transition. *Cardiovasc Res.* 2017; 113: 1603-14.  
252
- 253 2. Bayoumi AS, Park KM, Wang Y, Teoh JP, Aonuma T, Tang Y, et al. A carvedilol-  
254 responsive microRNA, miR-125b-5p protects the heart from acute myocardial infarction  
255 by repressing pro-apoptotic bak1 and klf13 in cardiomyocytes. *J Mol Cell Cardiol.* 2017;  
256 114: 72-82.  
257
- 258 3. Tang Y, Wang Y, Park KM, Hu Q, Teoh JP, Broskova Z, et al. MicroRNA-150 protects the  
259 mouse heart from ischaemic injury by regulating cell death. *Cardiovasc Res.* 2015; 106:  
260 387-97.  
261
- 262 4. Ramakrishna S, Kim IM, Petrovic V, Malin D, Wang IC, Kalin TV, et al. Myocardium defects  
263 and ventricular hypoplasia in mice homozygous null for the Forkhead Box M1 transcription  
264 factor. *Dev Dyn.* 2007; 236: 1000-13.  
265
- 266 5. Kim IM, Ackerson T, Ramakrishna S, Tretiakova M, Wang IC, Kalin TV, et al. The  
267 Forkhead Box m1 transcription factor stimulates the proliferation of tumor cells during  
268 development of lung cancer. *Cancer Res.* 2006; 66: 2153-61.  
269
- 270 6. Park KM, Teoh JP, Wang Y, Broskova Z, Bayoumi AS, Tang Y, et al. Carvedilol-  
271 responsive microRNAs, miR-199a-3p and -214 protect cardiomyocytes from simulated  
272 ischemia-reperfusion injury. *Am J Physiol Heart Circ Physiol.* 2016; 311: H371-83.  
273
- 274 7. Teoh JP, Park KM, Broskova Z, Jimenez FR, Bayoumi AS, Archer K, et al. Identification  
275 of gene signatures regulated by carvedilol in mouse heart. *Physiol Genomics.* 2015; 47:  
276 376-85.  
277
- 278 8. Zhu H, Han C, Lu D, Wu T. MiR-17-92 cluster promotes cholangiocarcinoma growth:  
279 evidence for PTEN as downstream target and IL-6/Stat3 as upstream activator. *Am J*  
280 *Pathol.* 2014; 184: 2828-39.  
281
- 282 9. Cossette SM, Gastonguay AJ, Bao X, Lerch-Gaggl A, Zhong L, Harmann LM, et al.  
283 Sucrose non-fermenting related kinase enzyme is essential for cardiac metabolism. *Biol*  
284 *Open.* 2014; 4: 48-61.  
285
- 286 10. Liao JM, Zeng SX, Zhou X, Lu H. Global effect of inauhzin on human p53-responsive  
287 transcriptome. *PLoS ONE.* 2012; 7: e52172.  
288
- 289 11. Stueckle TA, Lu Y, Davis ME, Wang L, Jiang BH, Holaskova I, et al. Chronic occupational  
290 exposure to arsenic induces carcinogenic gene signaling networks and neoplastic  
291 transformation in human lung epithelial cells. *Toxicol Appl Pharmacol.* 2012; 261: 204-16.  
292

293 12. Patterson TA, Lobenhofer EK, Fulmer-Smentek SB, Collins PJ, Chu TM, Bao W, et al.  
294 Performance comparison of one-color and two-color platforms within the MicroArray  
295 Quality Control (MAQC) project. *Nat Biotechnol.* 2006; 24: 1140-50.  
296  
297 13. Kim IM, Tilley DG, Chen J, Salazar NC, Whalen EJ, Violin JD, et al. Beta-blockers  
298 alprenolol and carvedilol stimulate beta-arrestin-mediated EGFR transactivation. *Proc*  
299 *Natl Acad Sci U S A.* 2008; 105: 14555-60.  
300  
301 14. Wang X. miRDB: a microRNA target prediction and functional annotation database with a  
302 wiki interface. *RNA.* 2008; 14: 1012-7.  
303  
304 15. Krek A, Grun D, Poy MN, Wolf R, Rosenberg L, Epstein EJ, et al. Combinatorial microRNA  
305 target predictions. *Nat Genet.* 2005; 37: 495-500.  
306  
307 16. Lewis BP, Shih IH, Jones-Rhoades MW, Bartel DP, Burge CB. Prediction of mammalian  
308 microRNA targets. *Cell.* 2003; 115: 787-98.  
309  
310  
311  
  
312  
  
313  
  
314  
  
315  
  
316  
  
317  
  
318  
  
319  
  
320  
  
321  
  
322  
  
323  
  
324  
  
325  
  
326  
  
327

## CircRNA Profiling

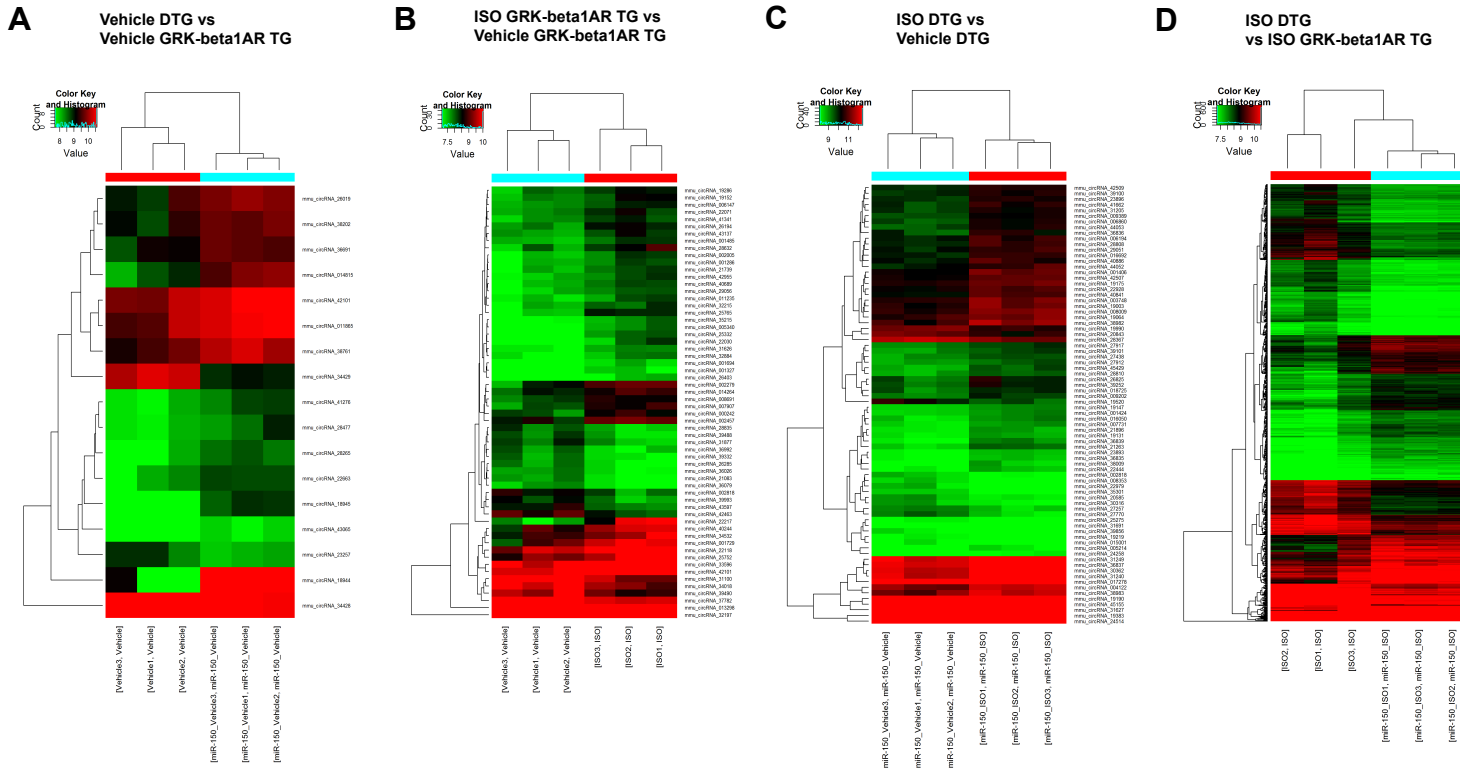

328  
329  
330  
331  
332  
333  
334  
335  
336  
337  
338  
339  
340  
341  
342  
343  
344  
345  
346  
347  
348  
349  
350  
351  
352  
353

**Figure S1. Circular RNA array analysis in mouse hearts.** GRK<sup>-</sup>β<sub>1</sub>AR TG and GRK<sup>-</sup>β<sub>1</sub>AR;miR-150 DTG mice were infused with 0.002% ascorbic acid with saline (vehicle control) and isoproterenol (ISO) [3mg/kg/day] for 7 days by using micro-osmotic pumps. Microarray experiments (Arraystar Inc) were conducted in mouse hearts. The heat map represents circular RNA (circRNA) expression values in four groups. The expression level was visualized via colors. Green means that those circRNAs are downregulated in two compared groups. Red means that those circRNAs are upregulated in two compared groups. Black means no change in expression. The identified circRNAs are statistically significant among the 14,236 mouse circRNAs profiled.

## CircRNA Profiling

**A**Vehicle DTG vs  
Vehicle GRK-beta1AR TG

Up: 14 &amp; Down: 3

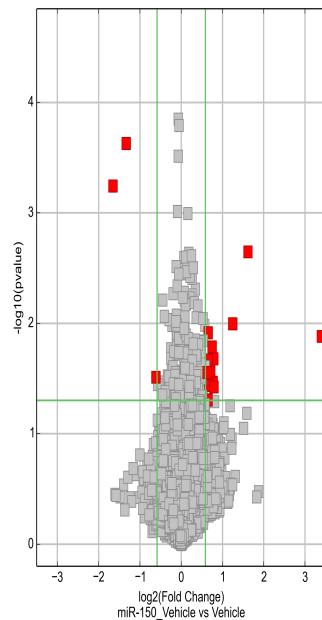**B**ISO GRK-beta1AR TG vs  
Vehicle GRK-beta1AR TG

Up: 42 &amp; Down: 18

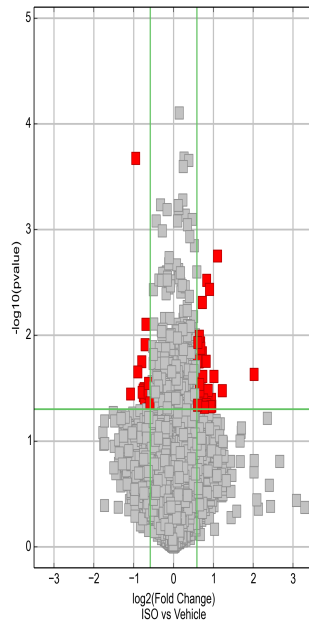**C**ISO DTG vs  
Vehicle DTG

Up: 58 &amp; Down: 20

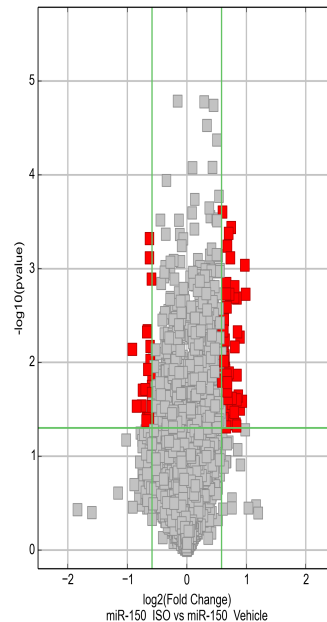**D**ISO DTG  
vs ISO GRK-beta1AR TG

Up: 458 &amp; Down: 517

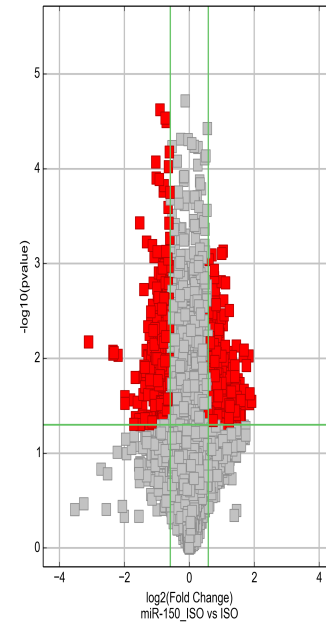

354  
355  
356  
357  
358  
359  
360  
361  
362  
363  
364  
365  
366  
367  
368  
369  
370  
371  
372  
373  
374  
375  
376  
377  
378

**Figure S2. Volcano plot analyses of differentially expressed cardiac circular RNAs to discover circular RNA signatures that are regulated by  $\beta_1$ AR/ $\beta$ -arrestin-mediated signaling selectively in cardiomyocytes and modulate miR-150. A-D, Volcano Plots are made using fold-change values and *P* values that allow visualization of the relationship between fold-change and statistical significance, taking both magnitudes of change and variability into consideration. The vertical lines correspond to 1.5-fold up and down, and the horizontal line represents a *P* value of 0.05. So, the right (up) or left (down) points in the plot represent the differentially expressed (DE) circular RNAs (circRNAs) with statistical significance. DE circRNAs in vehicle GRK<sup>-</sup> $\beta_1$ AR;miR-150 DTG compared to vehicle GRK<sup>-</sup> $\beta_1$ AR TG controls are shown in **A**, DE circRNAs in ISO GRK<sup>-</sup> $\beta_1$ AR TG compared to vehicle GRK<sup>-</sup> $\beta_1$ AR TG controls are shown in **B**, DE circRNAs in ISO GRK<sup>-</sup> $\beta_1$ AR;miR-150 DTG compared to vehicle GRK<sup>-</sup> $\beta_1$ AR;miR-150 DTG are shown in **C**, and DE circRNAs in ISO GRK<sup>-</sup> $\beta_1$ AR;miR-150 DTG compared to ISO GRK<sup>-</sup> $\beta_1$ AR TG at 7 days post-treatment are shown in **D**.**

# Figure S3

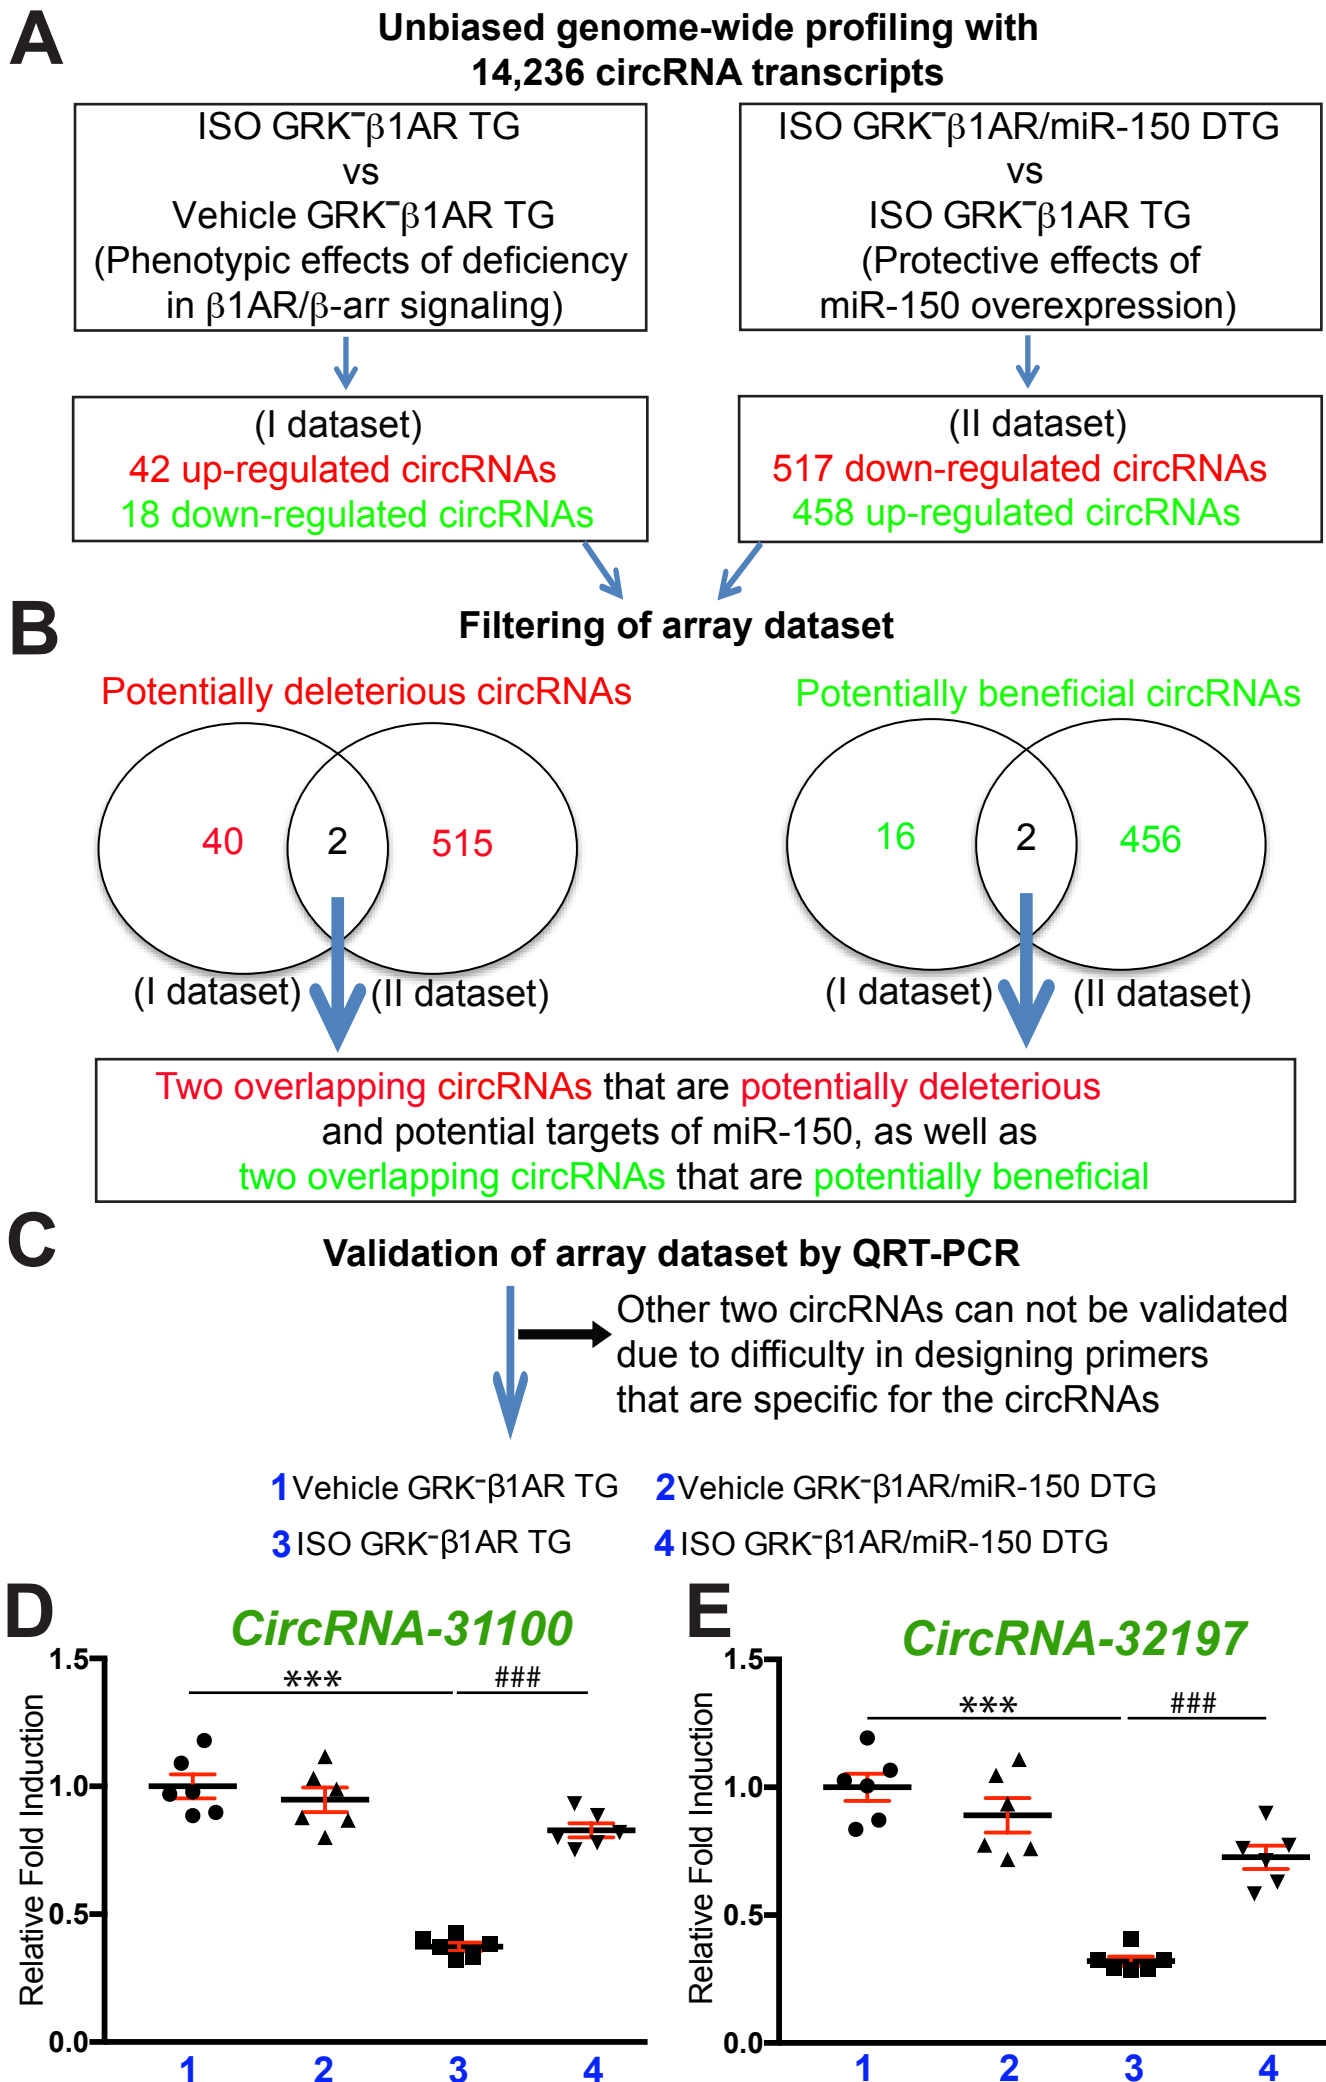



379  
380  
381  
382  
383  
384  
385  
386  
387  
388  
389  
390  
391  
392  
393  
394  
395  
396  
397  
398  
399  
400  
401  
402  
403

**Figure S3. Genome-wide circular RNA profiling in GRK<sup>-</sup>β<sub>1</sub>AR TG and GRK<sup>-</sup>β<sub>1</sub>AR;miR-150 DTG mice identifies novel circular RNAs that are regulated by β<sub>1</sub>AR/β-arrestin-mediated signaling and modulate miR-150.** **A-B**, Genome-wide profiling and filtering strategies of array dataset based on the correlation between transcript signatures and cardiac phenotypes. Two dysregulated (DE) circular RNAs (circRNAs), which are up-regulated in I dataset (ISO GRK<sup>-</sup>β<sub>1</sub>AR TG compared to vehicle GRK<sup>-</sup>β<sub>1</sub>AR TG controls) but are down-regulated in II dataset (ISO GRK<sup>-</sup>β<sub>1</sub>AR;miR-150 DTG compared to ISO GRK<sup>-</sup>β<sub>1</sub>AR TG) at 1 week post-treatment, were chosen for further analyses. Two other DE circRNAs, which are down-regulated in I dataset (ISO GRK<sup>-</sup>β<sub>1</sub>AR TG compared to vehicle GRK<sup>-</sup>β<sub>1</sub>AR TG controls) but are up-regulated in II dataset (ISO GRK<sup>-</sup>β<sub>1</sub>AR;miR-150 DTG compared to ISO GRK<sup>-</sup>β<sub>1</sub>AR TG) at 1 week post-treatment, were chosen for further analyses. N=3 per group. **C-D**, Validation strategy of array dataset. Two potentially beneficial DE circRNAs (CircRNA-31100 and CircRNA-32197) were validated by QRT-PCR analyses in LVs from GRK<sup>-</sup>β<sub>1</sub>AR TG and GRK<sup>-</sup>β<sub>1</sub>AR;miR-150 DTG mice at 1 week post-treatment. Note that other two circRNAs cannot be validated because of difficulty in designing primers specific for the circRNAs. We tried at least 4 different primer sets for each circRNA, but we failed to get reliable data due to wrong PCR product length on gel image, two peaks in melting curve, or no CT value. Data are presented as fold induction of circRNA expression normalized to *Gapdh*. N=6 per group. Two-way ANOVA with Tukey multiple comparison test. \*\*\**P*<0.001 vs. vehicle; ###*P*<0.001 vs. ISO GRK<sup>-</sup>β<sub>1</sub>AR TG. All data are presented as mean ± SEM.

## LncRNA Profiling

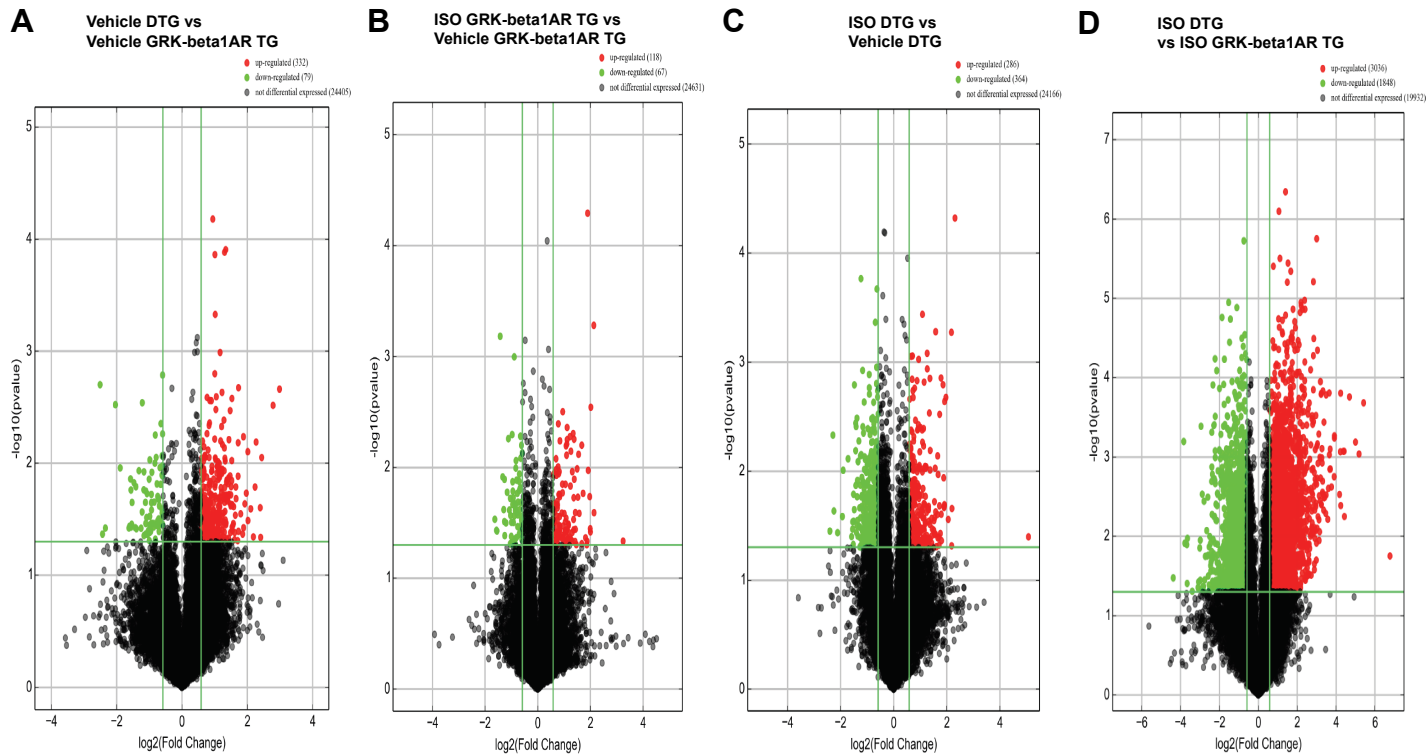

404  
405  
406  
407  
408  
409  
410  
411  
412  
413  
414  
415  
416  
417  
418  
419  
420  
421  
422  
423  
424  
425  
426  
427  
428

**Figure S4. Volcano plot analyses of differentially expressed cardiac long noncoding RNAs to discover long noncoding RNA signatures that are controlled by  $\beta_1$ AR/ $\beta$ -arrestin-mediated signaling selectively in cardiomyocytes and regulate miR-150. A-D, Volcano Plots** are made using fold-change values and *P* values that allow visualization of the relationship between fold-change and statistical significance, taking both magnitudes of change and variability into consideration. The vertical lines correspond to 1.5-fold up and down, and the horizontal line represents a *P* value of 0.05. So, the red (up) or green (down) points in the plot represent the differentially expressed (DE) long noncoding RNAs (lncRNAs) with statistical significance. DE lncRNAs in vehicle GRK $^{-}\beta_1$ AR;miR-150 DTG compared to vehicle GRK $^{-}\beta_1$ AR TG controls are shown in **A**, DE lncRNAs in ISO GRK $^{-}\beta_1$ AR TG compared to vehicle GRK $^{-}\beta_1$ AR TG controls are shown in **B**, DE lncRNAs in ISO GRK $^{-}\beta_1$ AR;miR-150 DTG compared to vehicle GRK $^{-}\beta_1$ AR;miR-150 DTG are shown in **C**, and DE lncRNAs in ISO GRK $^{-}\beta_1$ AR;miR-150 DTG compared to ISO GRK $^{-}\beta_1$ AR TG at 7 days post-treatment are shown in **D**.

## mRNA profiling

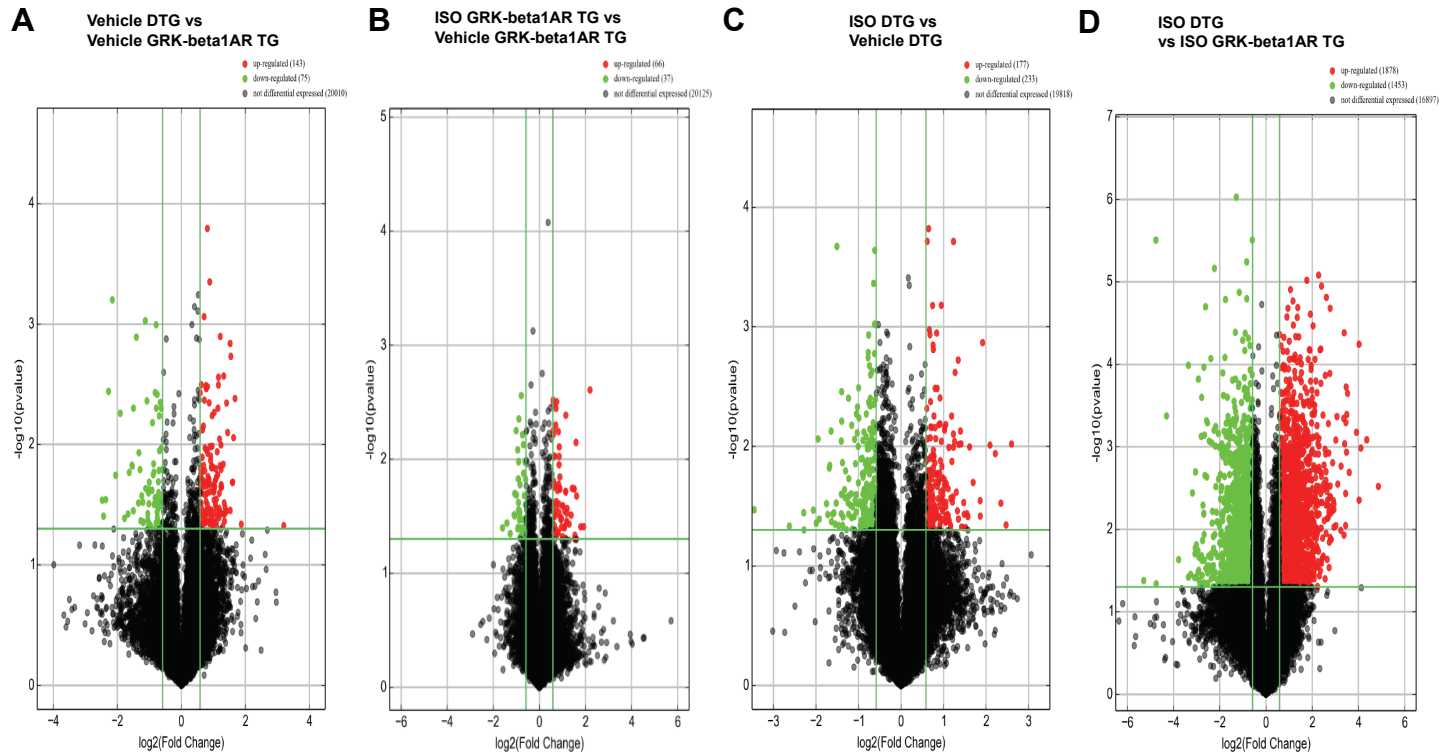

429  
430  
431  
432  
433  
434  
435  
436  
437  
438  
439  
440  
441  
442  
443  
444  
445  
446  
447  
448  
449  
450  
451  
452  
453

**Figure S5. Volcano plot analyses of differentially expressed cardiac genes to discover gene signatures that are regulated by  $\beta_1$ AR/ $\beta$ -arrestin-mediated signaling selectively in cardiomyocytes and control miR-150. A-D**, Volcano Plots are made using fold-change values and *P* values that allow visualization of the relationship between fold-change and statistical significance, taking both magnitudes of change and variability into consideration. The vertical lines correspond to 1.5-fold up and down, and the horizontal line represents a *P* value of 0.05. So, the red (up) or green (down) points in the plot represent the differentially expressed (DE) genes with statistical significance. DE genes in vehicle GRK<sup>-</sup> $\beta_1$ AR;miR-150 DTG compared to vehicle GRK<sup>-</sup> $\beta_1$ AR TG controls are shown in **A**, DE genes in ISO GRK<sup>-</sup> $\beta_1$ AR TG compared to vehicle GRK<sup>-</sup> $\beta_1$ AR TG controls are shown in **B**, DE genes in ISO GRK<sup>-</sup> $\beta_1$ AR;miR-150 DTG compared to vehicle GRK<sup>-</sup> $\beta_1$ AR;miR-150 DTG are shown in **C**, and DE genes in ISO GRK<sup>-</sup> $\beta_1$ AR;miR-150 DTG compared to ISO GRK<sup>-</sup> $\beta_1$ AR TG at 7 days post-treatment are shown in **D**.

Figure S6

## Upregulated Signaling Pathways

**A** Vehicle DTG vs Vehicle GRK-beta1AR TG

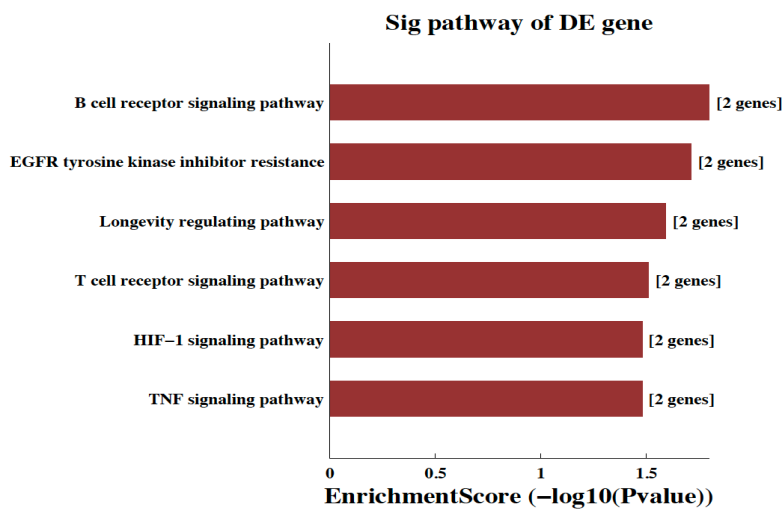

**B** ISO GRK-beta1AR TG vs Vehicle GRK-beta1AR TG

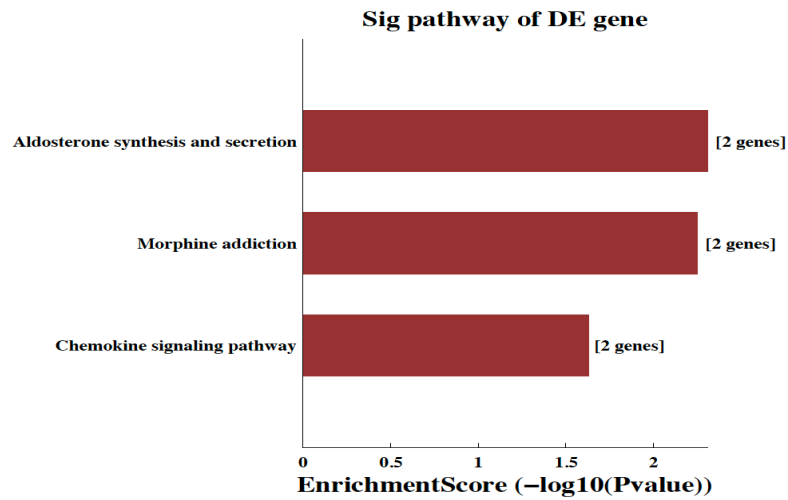

**C** ISO DTG vs Vehicle DTG

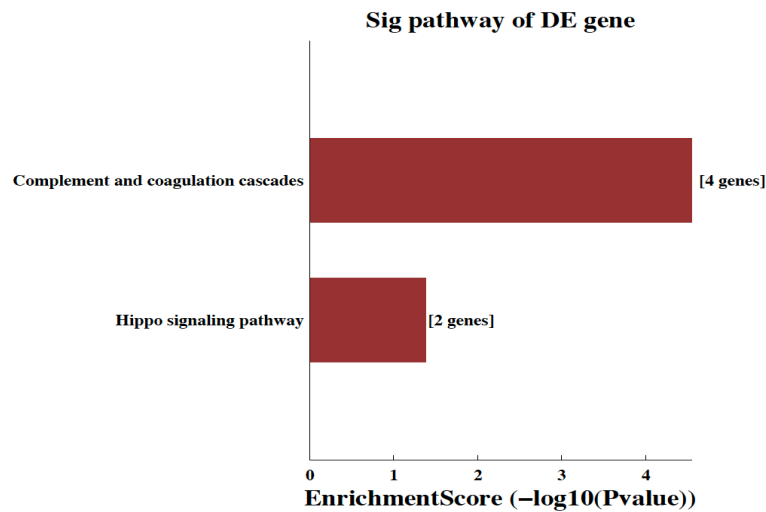

**D** ISO DTG vs ISO GRK-beta1AR TG

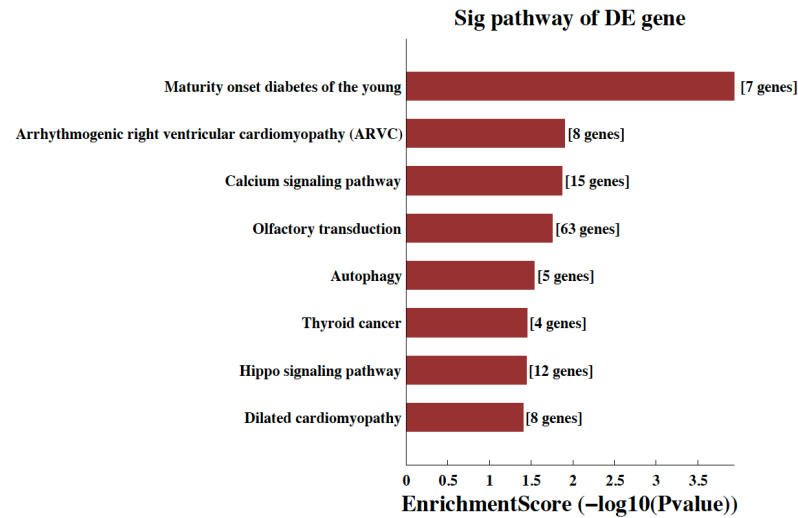

454  
455  
456  
457  
458  
459  
460  
461  
462  
463  
464  
465  
466  
467  
468  
469  
470  
471  
472  
473  
474  
475  
476  
477  
478

**Figure S6. Signaling pathway analyses of differentially upregulated genes.** The functional pathway analyses are performed by mapping differentially expressed (DE) genes to Kyoto Encyclopedia of Genes and Genomes (KEGG) pathways. Fisher's exact test is used. The *P* value indicates the significance of the pathway between groups (**A**: vehicle GRK<sup>-</sup>β<sub>1</sub>AR;miR-150 DTG compared to vehicle GRK<sup>-</sup>β<sub>1</sub>AR TG controls, **B**: ISO GRK<sup>-</sup>β<sub>1</sub>AR TG compared to vehicle GRK<sup>-</sup>β<sub>1</sub>AR TG controls, **C**: ISO GRK<sup>-</sup>β<sub>1</sub>AR;miR-150 DTG compared to vehicle GRK<sup>-</sup>β<sub>1</sub>AR;miR-150 DTG, and **D**: ISO GRK<sup>-</sup>β<sub>1</sub>AR;miR-150 DTG compared to ISO GRK<sup>-</sup>β<sub>1</sub>AR TG). Enrichment Score is the value of the Pathway ID, which equals to -log<sub>10</sub>(Pvalue). The bar plots represent the top enrichment score values of significant enrichment pathways. Among DE genes discovered in microarray analyses (Table S5), upregulated genes are only shown.

# Figure S7

## Downregulated Signaling Pathways

### A Vehicle DTG vs Vehicle GRK-beta1AR TG

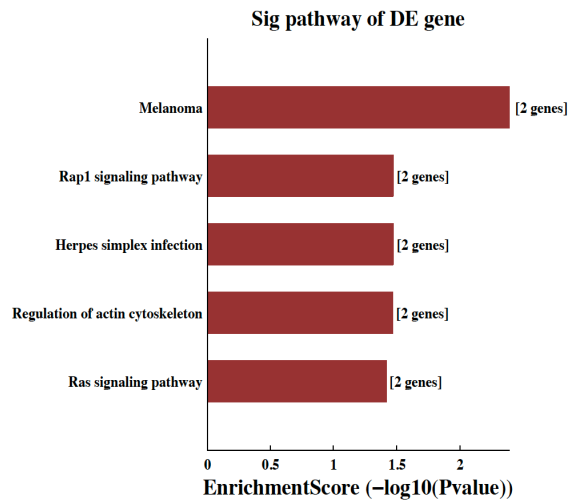

### B ISO DTG vs Vehicle DTG

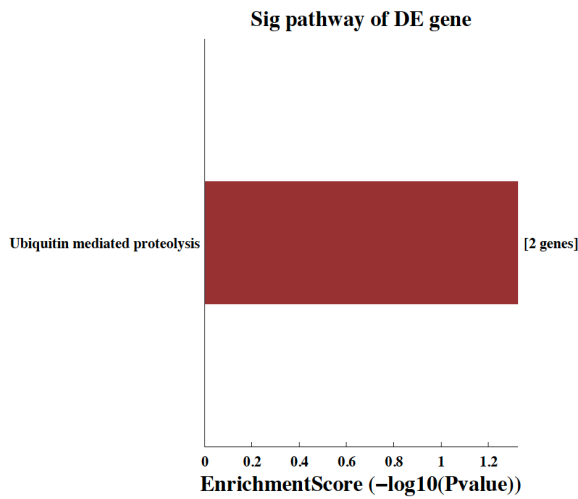

### C ISO DTG vs ISO GRK-beta1AR TG

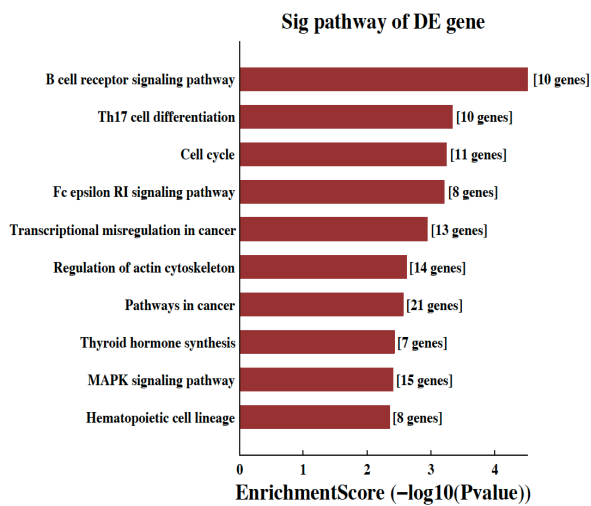



479  
480  
481  
482  
483  
484  
485  
486  
487  
488  
489  
490  
491  
492  
493  
494  
495  
496  
497  
498  
499  
500  
501  
502  
503

**Figure S7. Signaling pathway analyses of differentially downregulated genes.** The functional pathway analyses are performed by mapping differentially expressed (DE) genes to Kyoto Encyclopedia of Genes and Genomes (KEGG) pathways. Fisher's exact test is used. The *P* value indicates the significance of the pathway between groups (**A**: vehicle GRK<sup>-</sup>β<sub>1</sub>AR;miR-150 DTG compared to vehicle GRK<sup>-</sup>β<sub>1</sub>AR TG controls, **B**: ISO GRK<sup>-</sup>β<sub>1</sub>AR;miR-150 DTG compared to vehicle GRK<sup>-</sup>β<sub>1</sub>AR;miR-150 DTG, and **C**: ISO GRK<sup>-</sup>β<sub>1</sub>AR;miR-150 DTG compared to ISO GRK<sup>-</sup>β<sub>1</sub>AR TG). Enrichment Score is the value of the Pathway ID, which equals to -log<sub>10</sub>(*P*value). The bar plots represent the top enrichment score values of significant enrichment pathways. Among DE genes discovered in microarray analyses (Table S5), downregulated genes are only shown.

# Figure S8

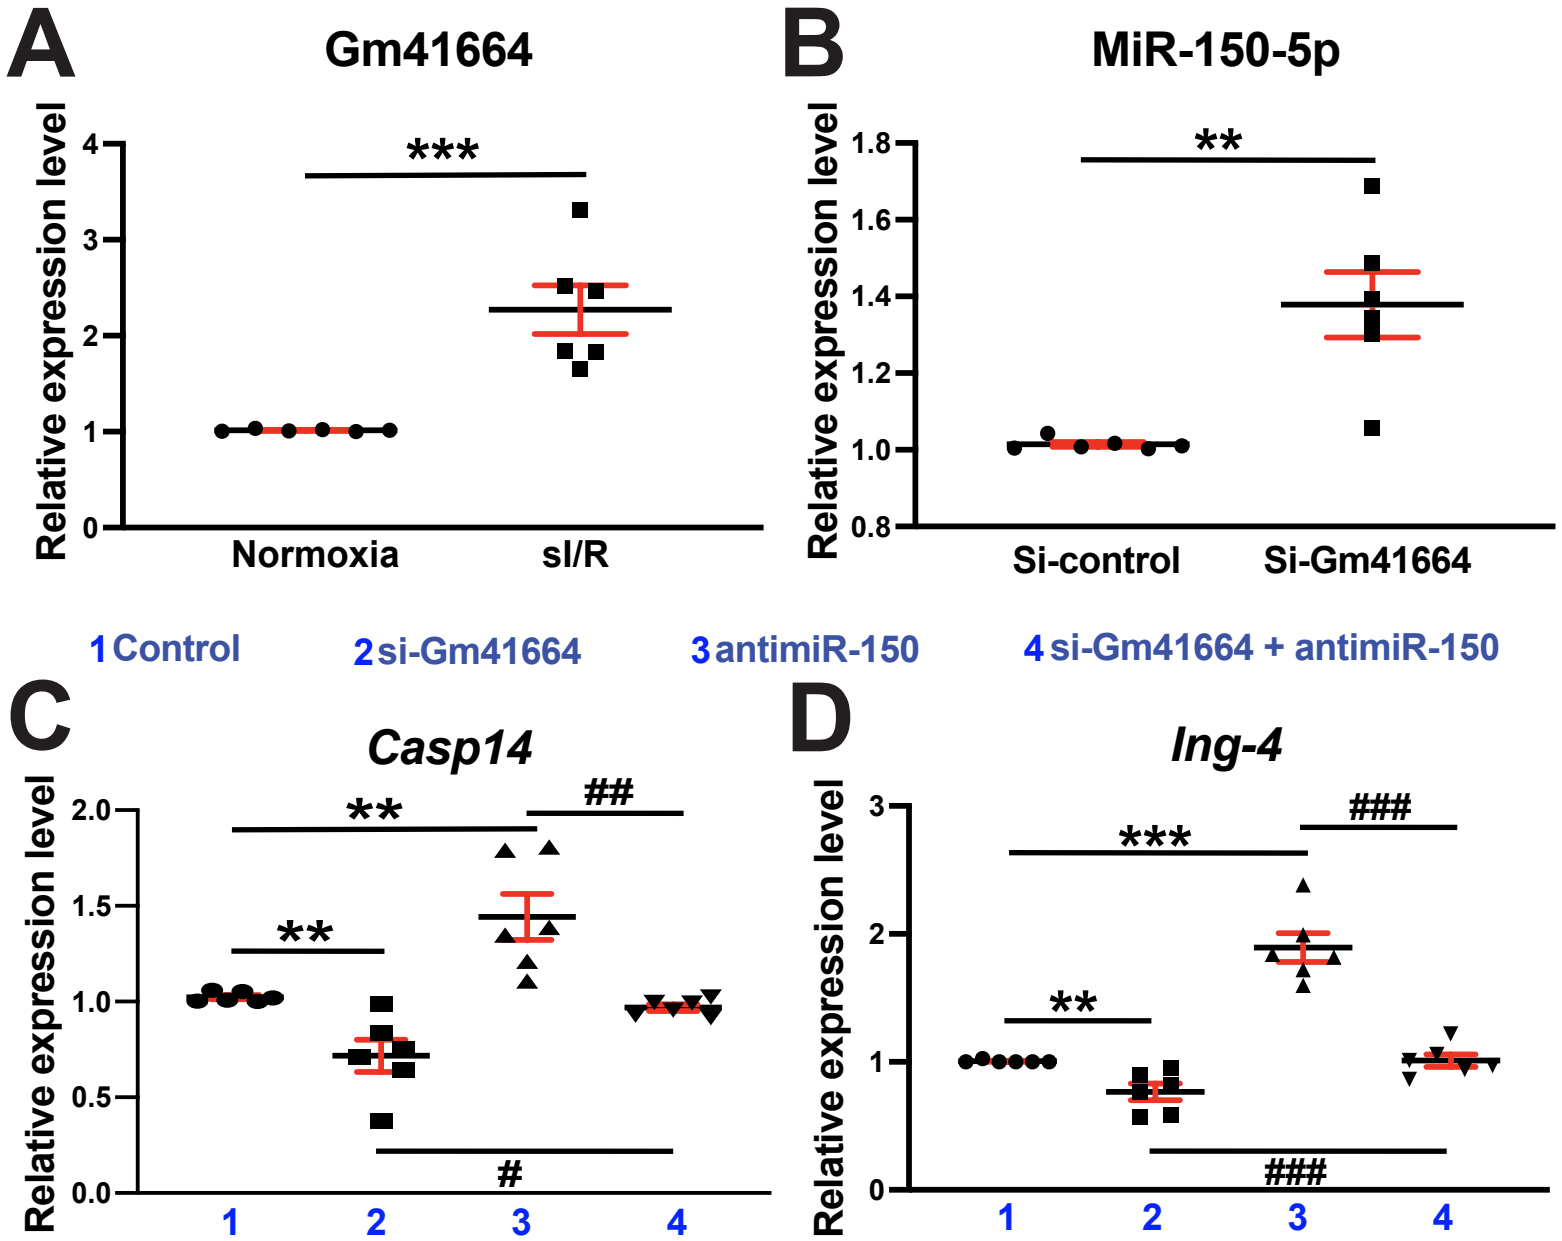

504  
505  
506  
507  
508  
509  
510  
511  
512  
513  
514  
515  
516  
517  
518  
519  
520  
521  
522  
523  
524  
525  
526  
527  
528  
529

**Figure S8. Gm41664 represses miR-150 in cardiomyocytes, and miR-150 is necessary for Gm41664-dependent regulation of pro-apoptotic *Casp14* or *Ing4* expression in cardiomyocytes.** **A**, Gm41664 is increased in CMs subjected to *in vitro* simulation of I/R (hypoxia/reoxygenation) [sI/R (H/R)]. HL-1 cells were subjected to sI/R. N=6. *Gm41664* expression compared to *Gapdh* was calculated using  $2^{-\Delta\Delta Ct}$ , and data are presented as fold induction of *Gm41664* expression levels normalized to normoxia. Unpaired 2-tailed t-test.  $***P<0.01$  vs. normoxia. **B**, HL-1 cells were transfected with control scramble siRNA (si-control) or Gm41664 siRNA (si-Gm41664). QRT-PCR for miR-150 was performed. Data were then normalized to *U6 snRNA* and expressed relative to si-control. N=6 per group. Unpaired 2-tailed t-test.  $**P<0.01$  vs. si-control. **C-D**, MiR-150 knockdown reverses the decreased pro-apoptotic gene expression mediated by Gm41664 knockdown in CMs. QRT-PCR expression analysis of pro-apoptotic *Casp14* and *Ing-4* in CMs transfected with 4 different groups as indicated. N=6. *Casp14* and *Ing-4* expression compared to *Gapdh* was calculated using  $2^{-\Delta\Delta Ct}$ , and data are presented as fold induction of *Casp14* and *Ing-4* expression levels normalized to control (si-control or antimiR control). One-way ANOVA with Tukey multiple comparison test.  $**P<0.01$  or  $***P<0.001$  vs. control.  $\#P<0.05$ ,  $\##P<0.01$  or  $\###P<0.001$  vs. si-Gm41664 + antimiR-150.

● si-Control

■ si-Gm41664

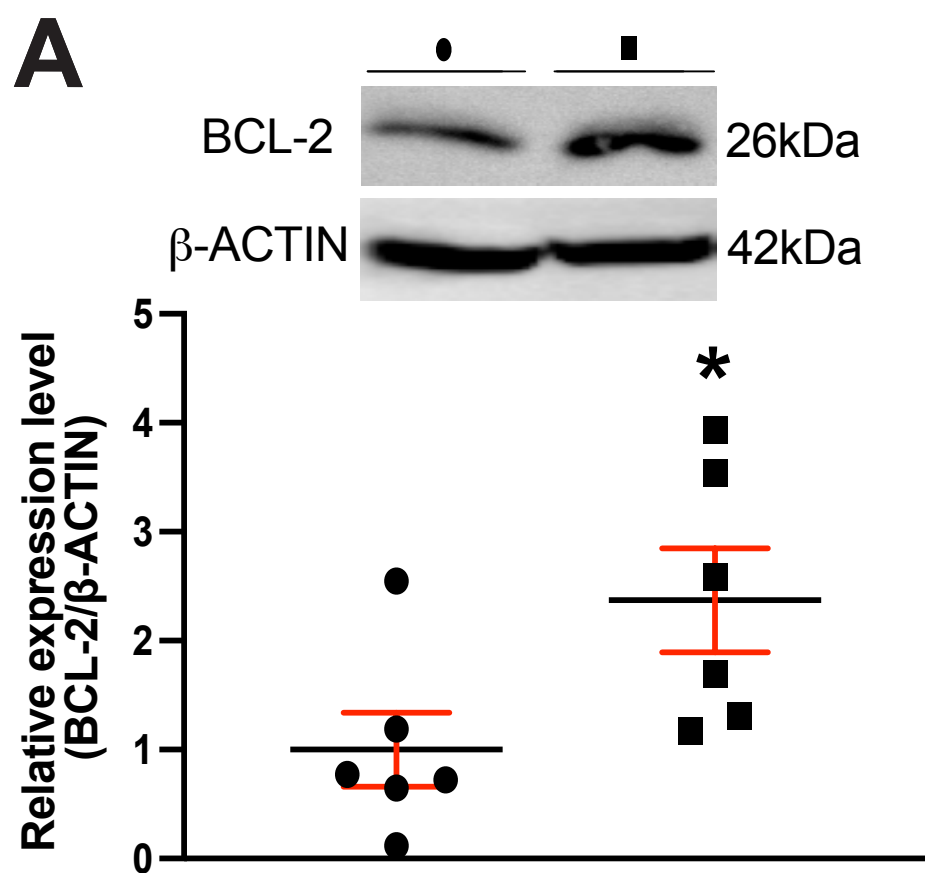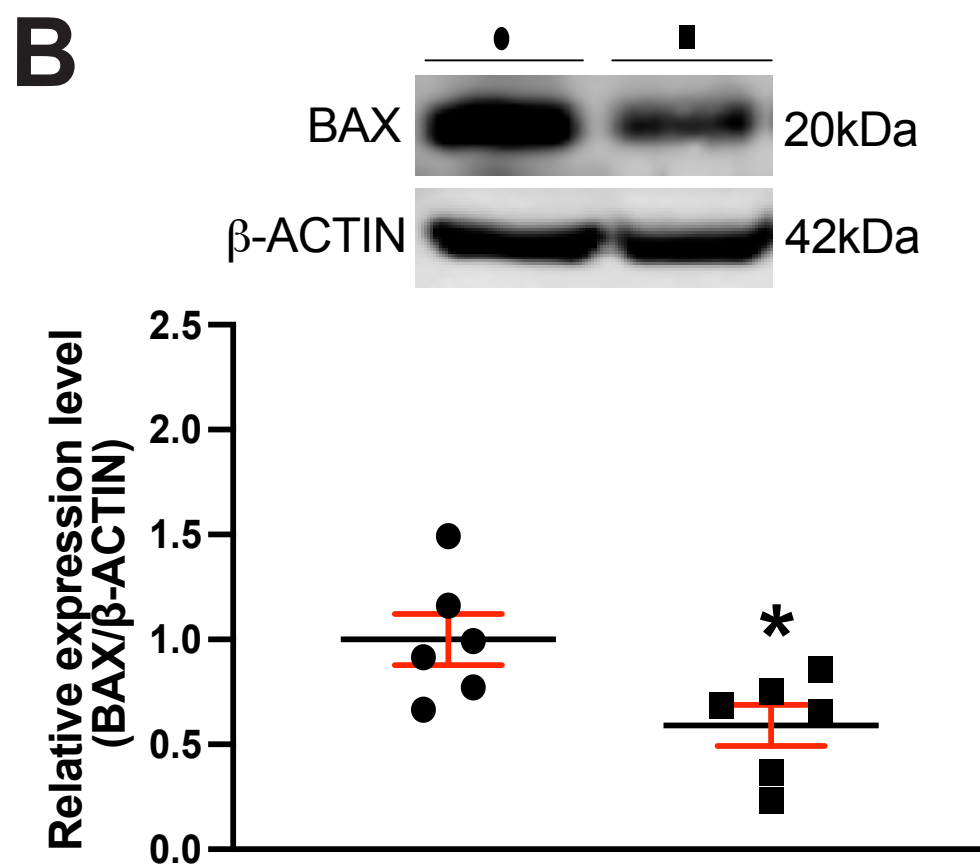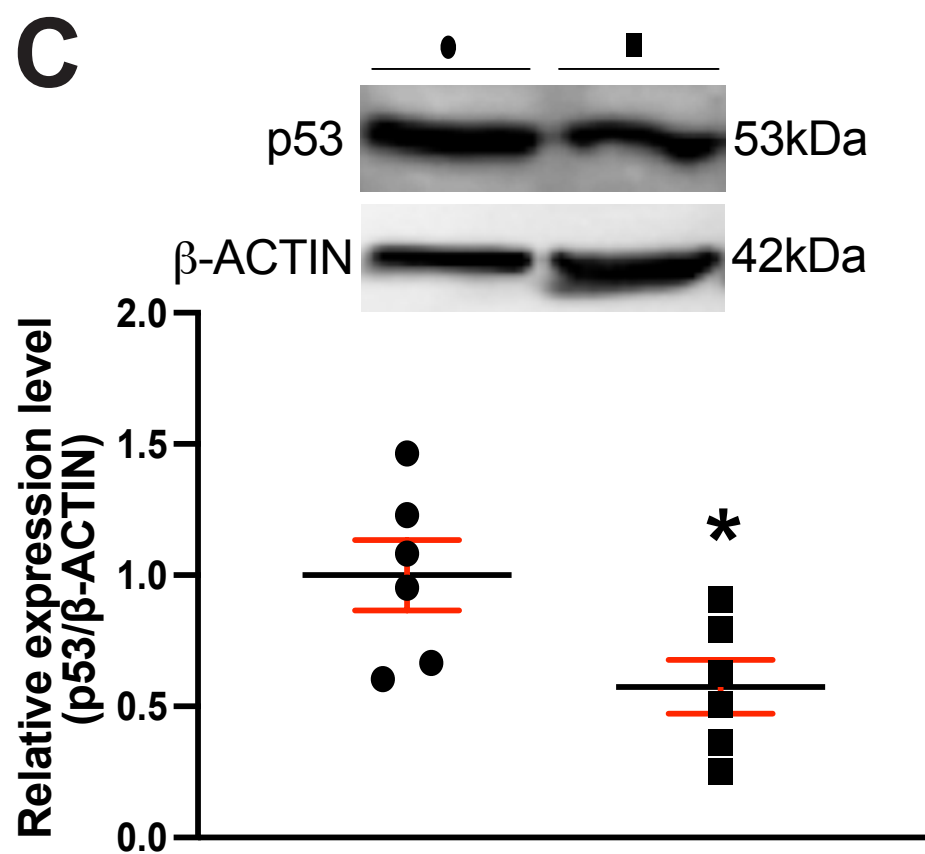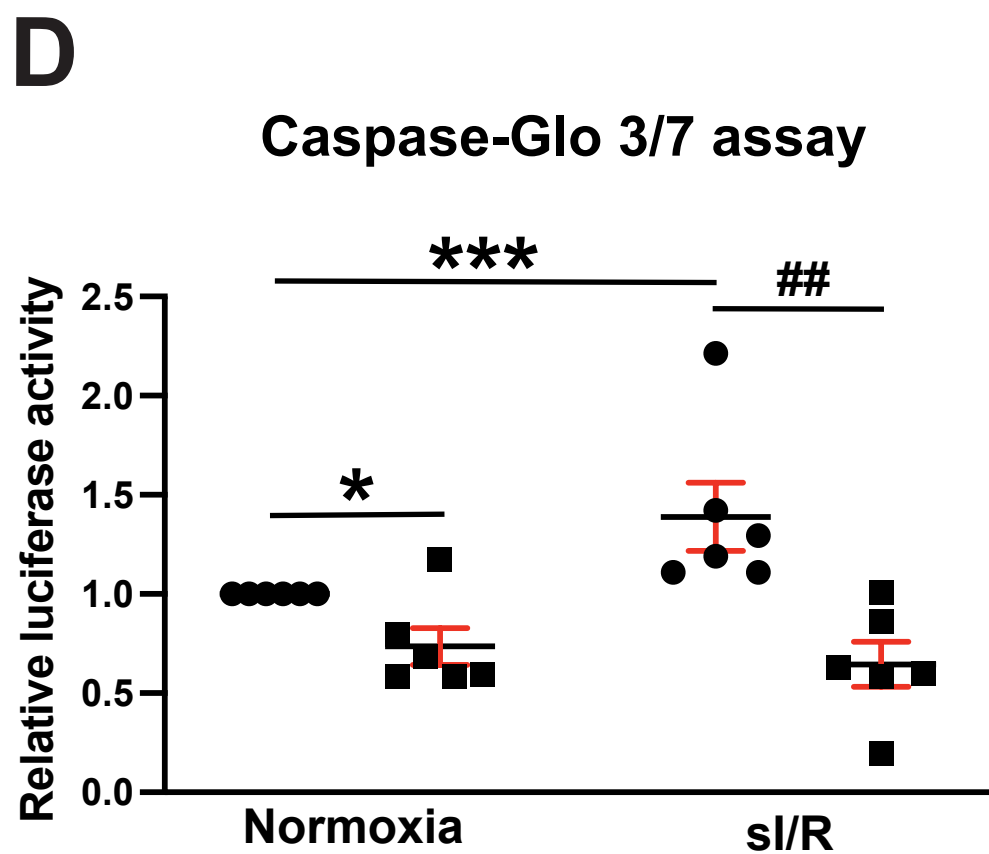

530  
531  
532  
533  
534  
535  
536  
537  
538  
539  
540  
541  
542  
543  
544  
545  
546  
547  
548  
549  
550  
551  
552  
553  
554  
555

**Figure S9. Gm41664 induces cardiomyocyte apoptosis. A-C**, Gm41664 knockdown in CMs increases antiapoptotic BCL-2 and decreases proapoptotic levels of BAX and p53. HL-1 cells were transfected with control scramble siRNA (si-Control) or Gm41664 siRNA (si-Gm41664). Western Blotting analyses of antiapoptotic BCL-2 (**A**) and proapoptotic BAX and p53 (**B-C**) were performed. N=6 per group. Data are presented as fold induction of protein expression normalized to  $\beta$ -ACTIN. Unpaired 2-tailed t-test. \* $P < 0.05$  vs. si-Control. **D**, Gm41664 knockdown decreases caspase-3/7 activity. HL-1 cells were transfected with si-Control or si-Gm41664 and subjected to *in vitro* simulation of I/R (hypoxia/reoxygenation) [sI/R (H/R)]. Caspase-Glo 3/7 luciferase assay was then performed. Data were expressed relative to si-Control normoxia. N=6 per group. One-way ANOVA with Tukey multiple comparison test. \* $P < 0.05$  or \*\*\* $P < 0.001$  vs. si-control normoxia. ## $P < 0.01$  vs. si-control normoxia sI/R.

# Figure S10

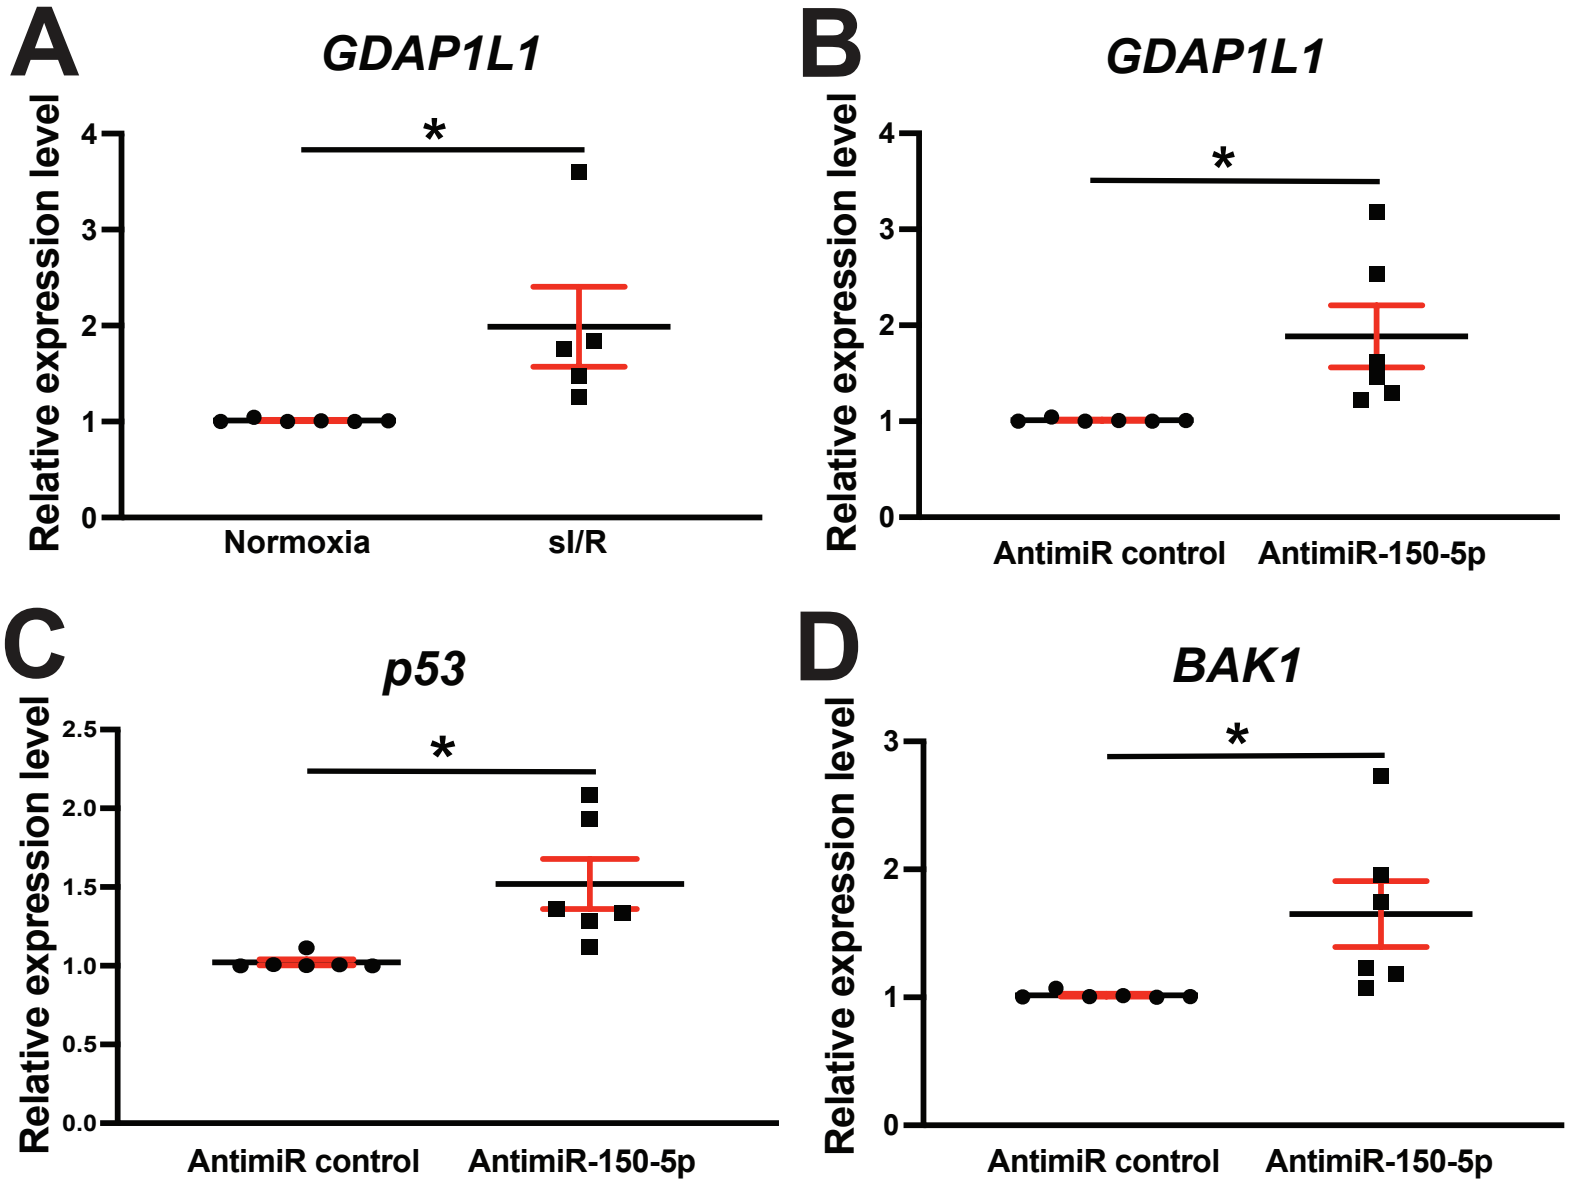

556  
557  
558  
559  
560  
561  
562  
563  
564  
565  
566  
567  
568  
569  
570  
571  
572  
573  
574  
575  
576  
577  
578  
579  
580  
581

**Figure S10. *GDAP1L1* is repressed by pro-survival miR-150 in human cardiomyocytes. A,** *GDAP1L1* is increased in human cardiomyocytes (HuCMs) subjected to *in vitro* simulation of I/R (hypoxia/reoxygenation) [sI/R (H/R)]. AC16 cells were subjected to sI/R. N=5-6. *GDAP1L1* expression compared to *GAPDH* was calculated using  $2^{-\Delta\Delta Ct}$ , and data are presented as fold induction of *GDAP1L1* expression levels normalized to normoxia. Unpaired 2-tailed t-test. \* $P < 0.05$  vs. normoxia. **B-D**, AC16 cells were transfected with antimiR control or antimiR-150. QRT-PCR for pro-apoptotic *GDAP1L1* (**B**), *p53* (**C**), and *BAK1* (**D**) was performed. Data were then normalized to *GAPDH* and expressed relative to antimiR control. N=6 per group. Unpaired 2-tailed t-test. \* $P < 0.05$  vs. antimiR control.

# Figure S11

● Si-control ■ Si-GDAP1L1

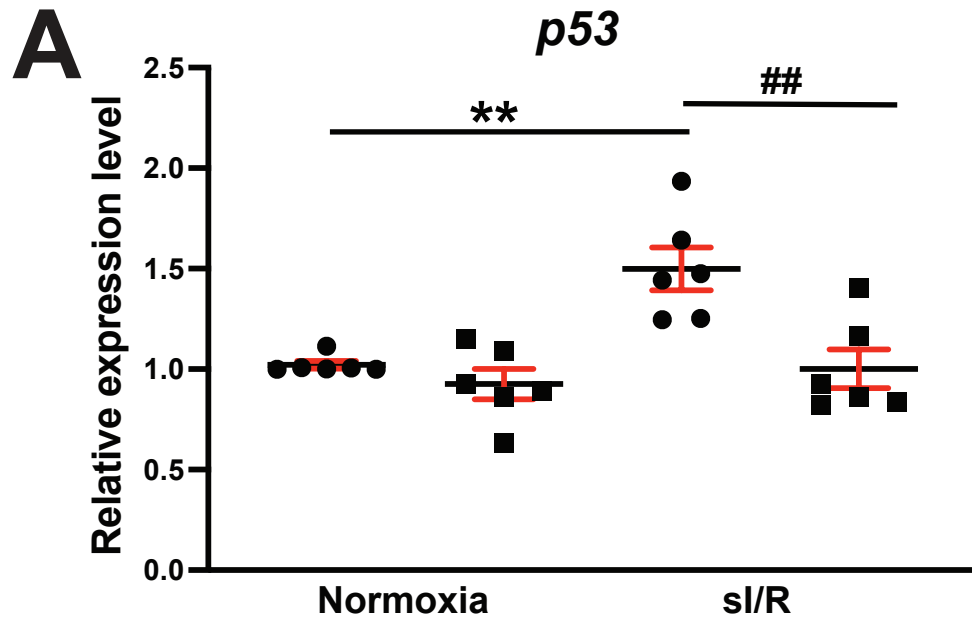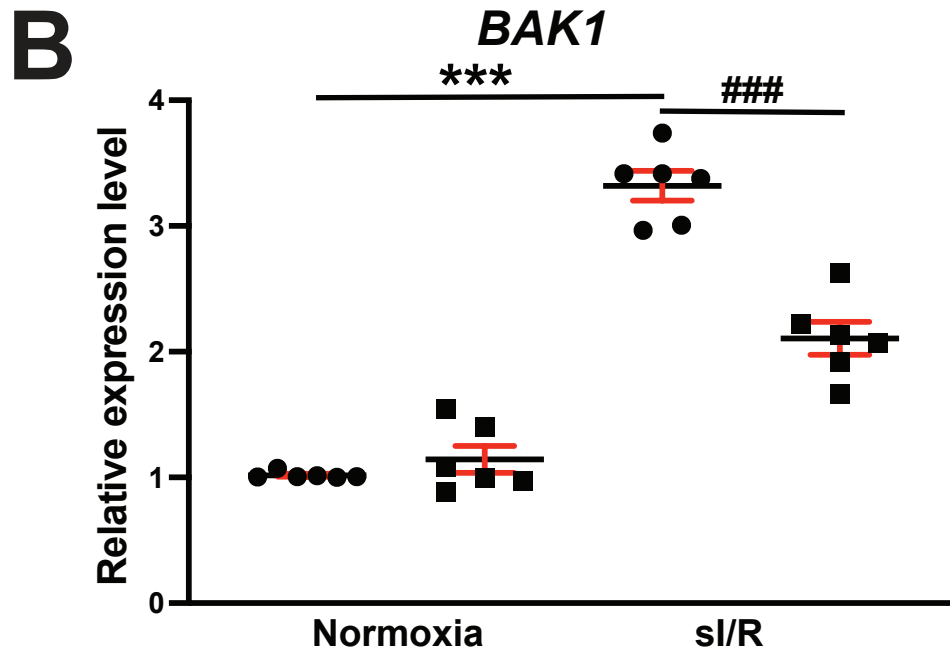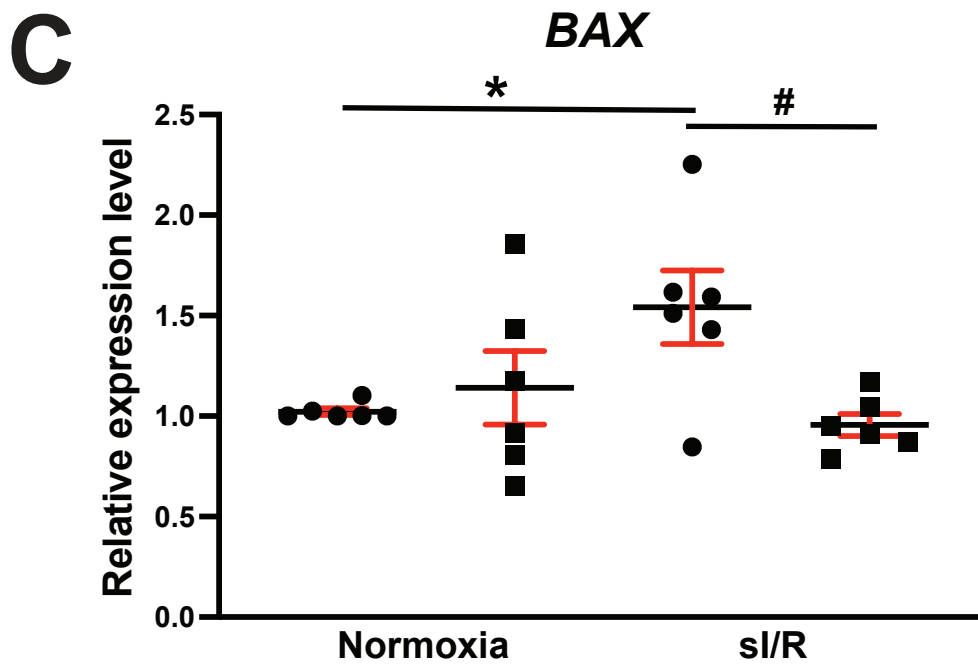



582  
583  
584  
585  
586  
587  
588  
589  
590  
591  
592  
593  
594  
595  
596  
597  
598  
599  
600  
601  
602  
603  
604  
605  
606  
607

**Figure S11. *GDAP1L1* activates pro-apoptotic gene expression in human cardiomyocytes.**  
**A-C**, AC-16 cells were transfected with control scramble siRNA (si-control) or *GDAP1L1* siRNA (si-*GDAP1L1*) and were subjected to *in vitro* simulation of I/R (hypoxia/reoxygenation) [si/R (H/R)]. QRT-PCR expression analyses of pro-apoptotic *p53*, *BAK1* and *BAX* in human cardiomyocytes (HuCMs) were then conducted. N=6. *p53*, *BAK1* and *BAX* expression compared to *GAPDH* was calculated using  $2^{-\Delta\Delta Ct}$ , and data are shown as fold induction of *p53*, *BAK1* and *BAX* expression levels normalized to control (si-control normoxia). One-way ANOVA with Tukey multiple comparison test. \* $P < 0.05$ , \*\* $P < 0.01$  or \*\*\* $P < 0.001$  vs. si-control normoxia. # $P < 0.05$ , ## $P < 0.01$  or ### $P < 0.001$  vs. si-control si/R.

Figure S12

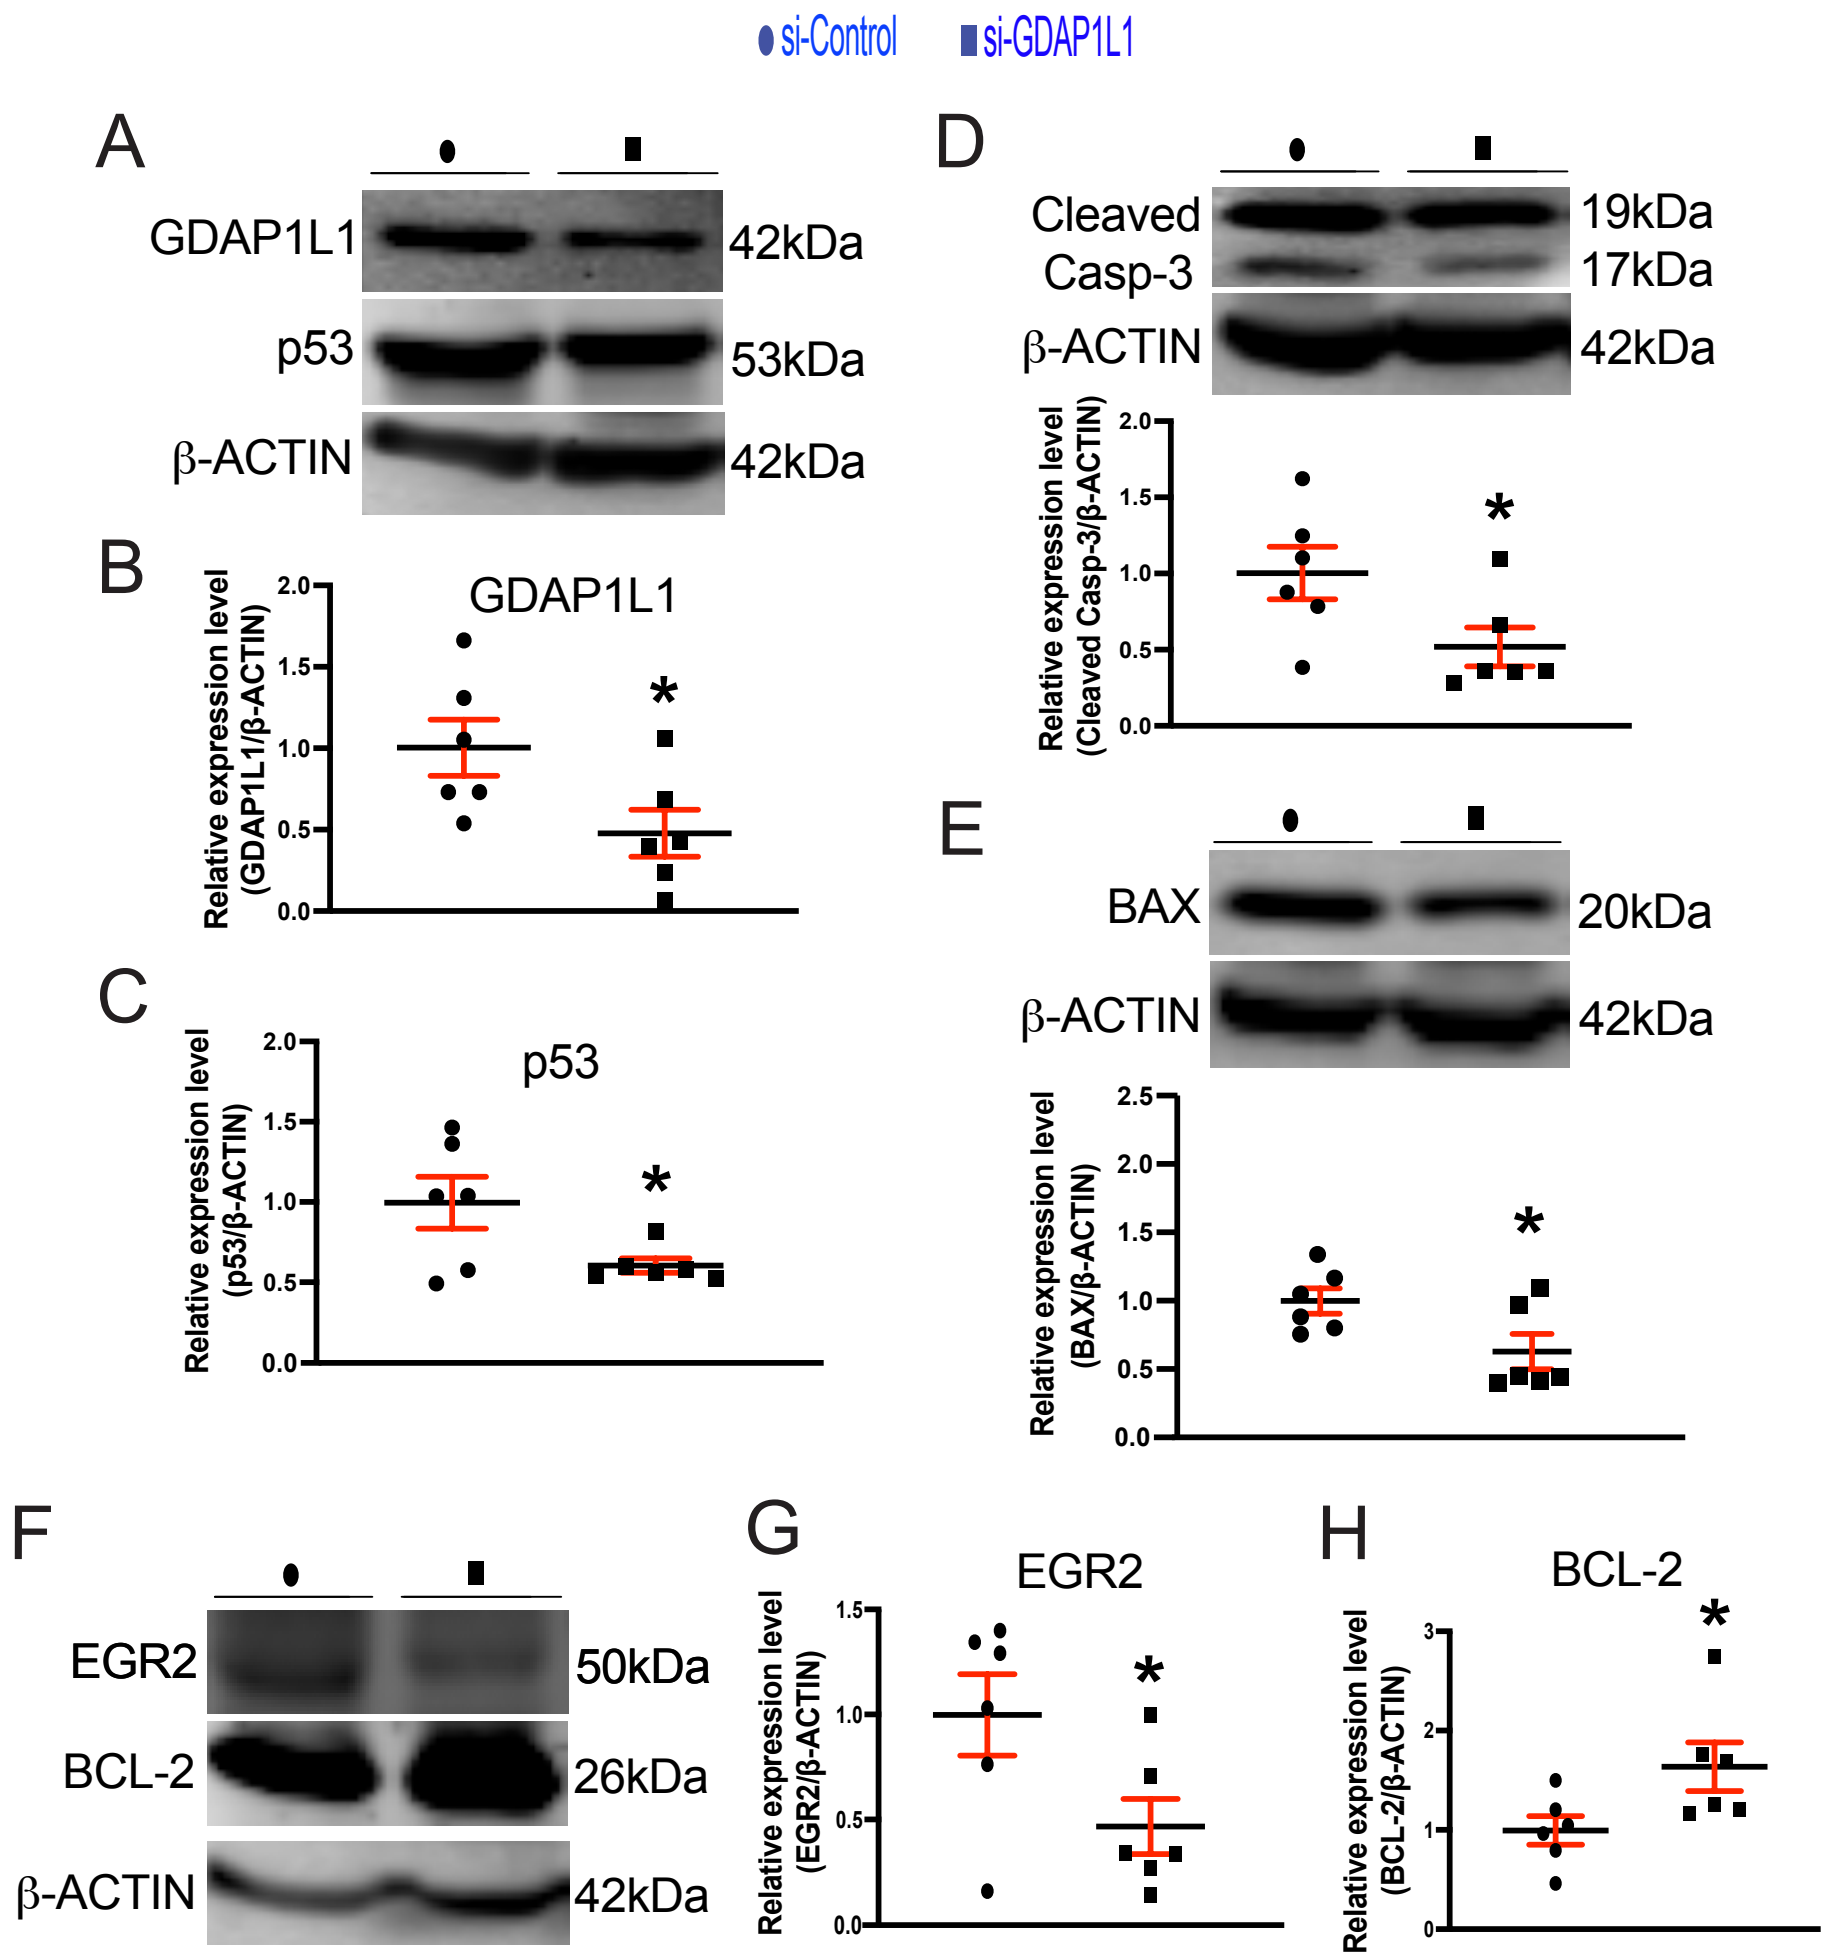

608  
609  
610  
611  
612  
613  
614  
615  
616  
617  
618  
619  
620  
621  
622  
623  
624  
625  
626  
627  
628  
629  
630  
631  
632  
633

**Figure S12. *GDAP1L1* knockdown in human cardiomyocytes decreases pro-apoptotic markers, while increasing anti-apoptotic BCL-2.** **A-H**, Human cardiomyocytes (HuCMs) were transfected with control scramble siRNA (si-Control) or *GDAP1L1* siRNA (si-*GDAP1L1*). Western Blotting analysis of *GDAP1L1* (**A-B**), pro-apoptotic p53 (**A & C**), CLEAVED CASAPASE-3 (**D**), BAX (**E**), and EGR2 (**F-G**), as well as anti-apoptotic BCL-2 (**F & H**) were performed. *GDAP1L1* knockdown reduces pro-apoptotic protein levels but induces anti-apoptotic BCL-2 in HuCMs. N=6 per group. Data are presented as fold induction of or protein expression normalized to  $\beta$ -ACTIN. Unpaired 2-tailed t-test. \* $P < 0.05$  vs. si-Control.

# Figure S13

- Control
- si-Gm41664
- ▲ antimiR-150
- ▼ si-Gm41664 + antimiR-150

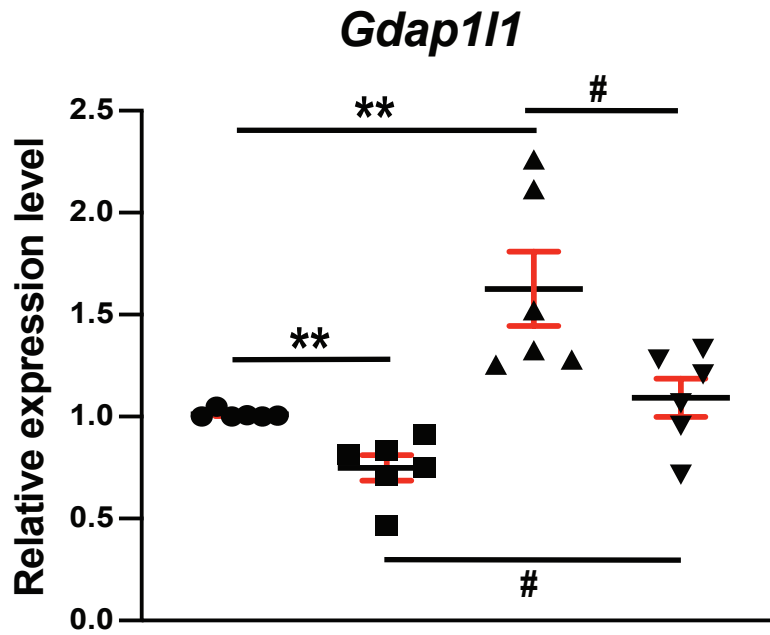

634  
635  
636  
637  
638  
639  
640  
641  
642  
643  
644  
645  
646  
647  
648  
649  
650  
651  
652  
653  
654  
655  
656  
657  
658  
659

**Figure S13. Gm41664 activates *Gdap111* in cardiomyocytes in part by repressing miR-150.**

HL-1 cells were transfected with 4 different groups as indicated. QRT-PCR expression analysis of pro-apoptotic *Gdap111* in cardiomyocytes (CMs) were performed. Gm41664 knockdown decreases the expression in *Gdap111* in CMs, which is reversed by miR-150 knockdown. N=6. *Gdap111* expression compared to *Gapdh* was calculated using  $2^{-\Delta\Delta Ct}$ . Data are presented as fold induction of *Gdap111* expression levels normalized to control (si-control or antimiR control). One-way ANOVA with Tukey multiple comparison test. \*\* $P < 0.01$  vs. control. # $P < 0.05$  vs. si-Gm41664 + antimiR-150.

Figure S14

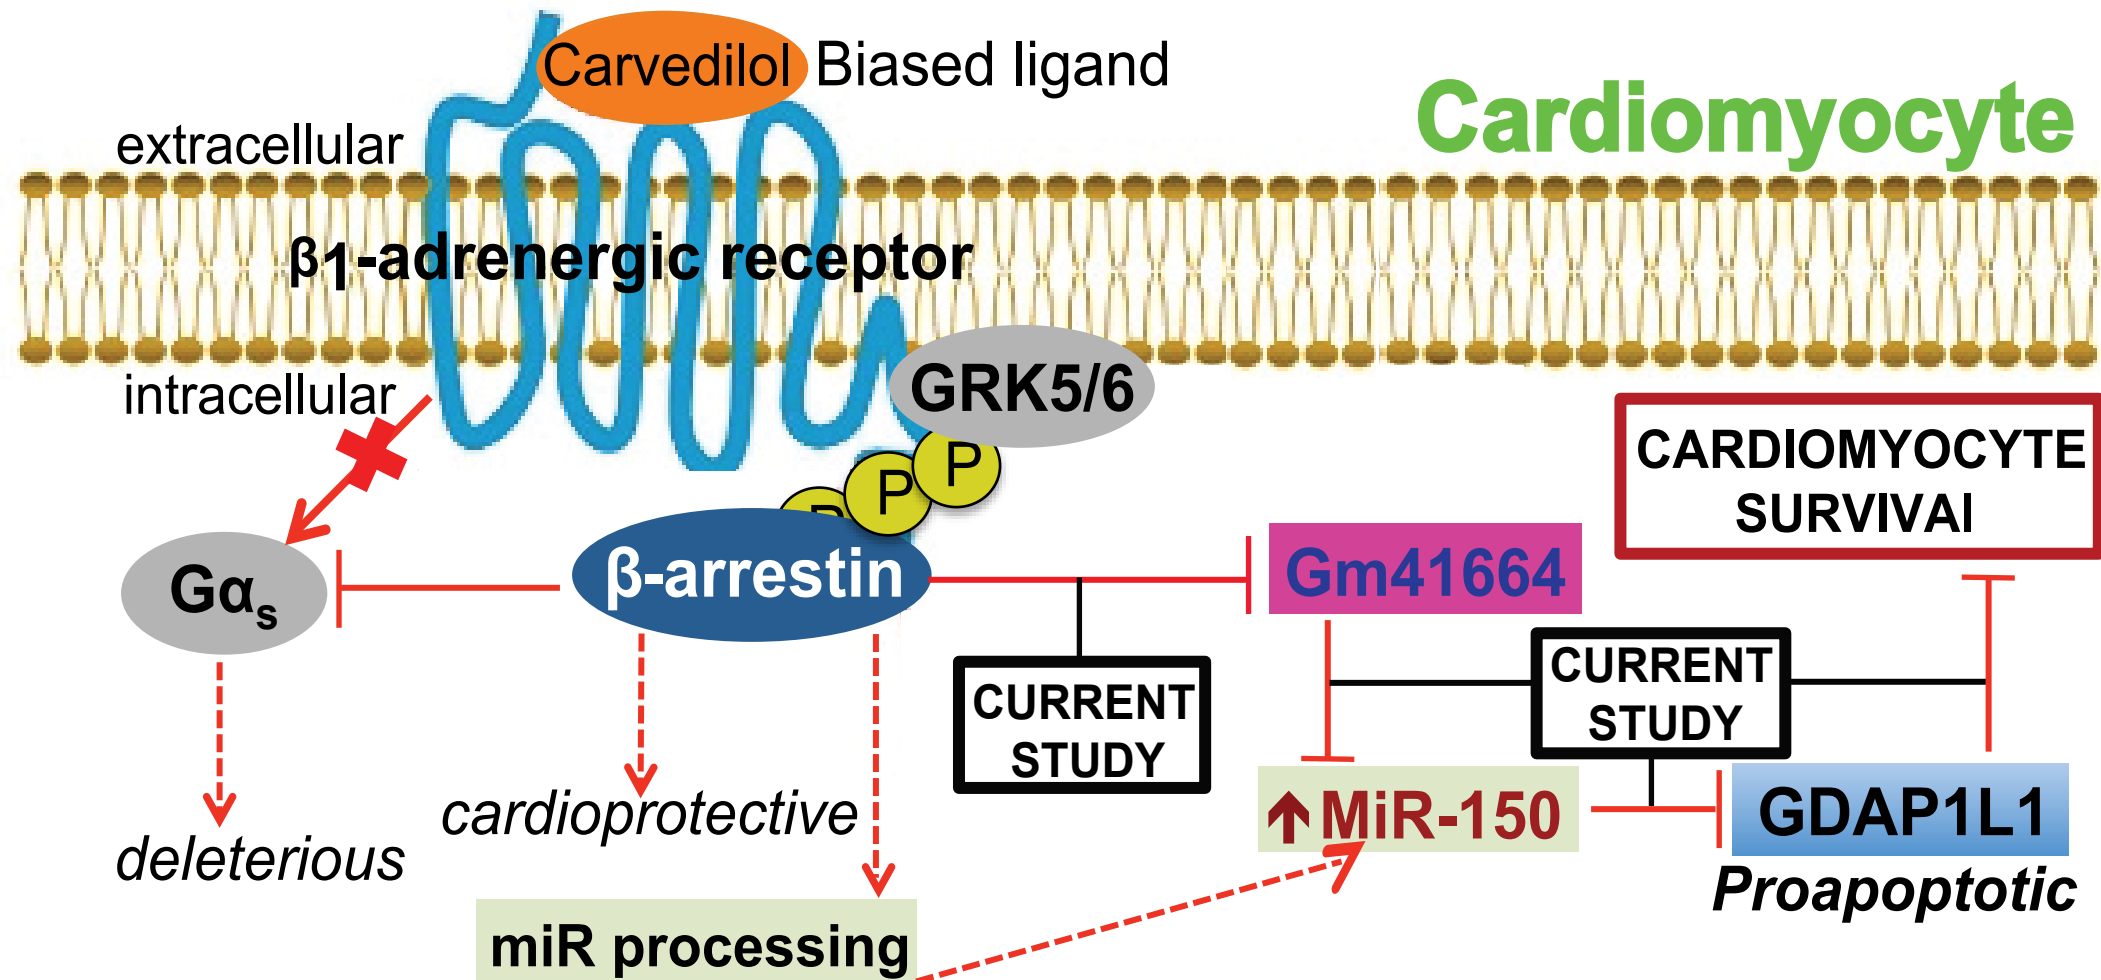

660

661

662 **Figure S14. Conceptual framework and schematic illustration summarizing the current**

663 **study.** P: phosphorylated by G protein-coupled receptor kinase (GRK) 5/6. MiR: microRNA.

664 GDAP1L1: Ganglioside induced differentiation associated protein 1 like 1.

665

**Table S1.** Echocardiographic parameters in anesthetized GRK $\beta$ 1AR TG and GRK $\beta$ 1AR/miR-150 DTG mice before they were randomly assigned to 4 experimental groups.

| Day 0                                       | GRK $\beta$ 1AR TG |                      | GRK $\beta$ 1AR/miR-150 DTG |                      |
|---------------------------------------------|--------------------|----------------------|-----------------------------|----------------------|
|                                             | Vehicle (n=18)     | Isoproterenol (n=18) | Vehicle (n=18)              | Isoproterenol (n=18) |
| <b>CO (ml/min)</b>                          | 23.71 $\pm$ 1.33   | 22.38 $\pm$ 1.71     | 21.89 $\pm$ 1.21            | 22.35 $\pm$ 1.42     |
| <b>EF (%)</b>                               | 72.64 $\pm$ 0.52   | 72.06 $\pm$ 0.51     | 71.61 $\pm$ 0.59            | 72.36 $\pm$ 0.62     |
| <b>FS (%)</b>                               | 43.71 $\pm$ 0.43   | 43.55 $\pm$ 0.49     | 43.01 $\pm$ 0.39            | 43.35 $\pm$ 0.37     |
| <b>HR (bpm)</b>                             | 507 $\pm$ 5.71     | 519 $\pm$ 11.05      | 520 $\pm$ 14.83             | 510 $\pm$ 9.57       |
| <b>SV (<math>\mu</math>l)</b>               | 33.20 $\pm$ 1.55   | 32.42 $\pm$ 1.28     | 32.74 $\pm$ 1.05            | 34.22 $\pm$ 3.81     |
| <b>Volume, diastole (<math>\mu</math>l)</b> | 50.37 $\pm$ 3.43   | 52.48 $\pm$ 2.61     | 53.83 $\pm$ 2.55            | 51.30 $\pm$ 4.29     |
| <b>Volume, systole (<math>\mu</math>l)</b>  | 14.51 $\pm$ 1.33   | 14.20 $\pm$ 0.91     | 13.85 $\pm$ 0.77            | 12.92 $\pm$ 1.04     |
| <b>LVAW, diastole (mm)</b>                  | 0.73 $\pm$ 0.07    | 0.79 $\pm$ 0.06      | 0.81 $\pm$ 0.06             | 0.83 $\pm$ 0.03      |
| <b>LVAW, systole (mm)</b>                   | 1.21 $\pm$ 0.05    | 1.18 $\pm$ 0.04      | 1.22 $\pm$ 0.03             | 1.24 $\pm$ 0.07      |
| <b>LVID, diastole (mm)</b>                  | 2.53 $\pm$ 0.06    | 2.76 $\pm$ 0.07      | 2.87 $\pm$ 0.04             | 2.65 $\pm$ 0.08      |
| <b>LVID, systole (mm)</b>                   | 1.53 $\pm$ 0.08    | 1.49 $\pm$ 0.04      | 1.57 $\pm$ 0.09             | 1.51 $\pm$ 0.03      |
| <b>LVPW, diastole (mm)</b>                  | 0.55 $\pm$ 0.04    | 0.57 $\pm$ 0.02      | 0.58 $\pm$ 0.06             | 0.54 $\pm$ 0.05      |
| <b>LVPW, systole (mm)</b>                   | 0.73 $\pm$ 0.03    | 0.78 $\pm$ 0.08      | 0.75 $\pm$ 0.05             | 0.79 $\pm$ 0.07      |

Abbreviations: CO = cardiac output, EF = ejection fraction, FS = fractional shortening, HR = heart rate, SV = stroke volume, LVAW = left ventricular anterior wall thickness, LVID = left ventricular interior diameter, LVPW = left ventricular posterior wall thickness. All values are expressed as mean  $\pm$  SEM.



**Table S2.** Echocardiographic and morphometric parameters in anesthetized GRK $\beta$ 1AR TG and GRK $\beta$ 1AR/miR-150 DTG mice infused with vehicle or isoproterenol for 7 days.

| Day 7                 | GRK $\beta$ 1AR TG |                      | GRK $\beta$ 1AR/miR-150 DTG |                      |
|-----------------------|--------------------|----------------------|-----------------------------|----------------------|
| Echocardiography      | Vehicle (n=18)     | Isoproterenol (n=18) | Vehicle (n=18)              | Isoproterenol (n=18) |
| CO (ml/min)           | 22.38 ± 1.71       | 15.25 ± 1.87**       | 23.44 ± 1.14                | 20.44 ± 1.35#        |
| EF (%)                | 72.62 ± 0.52       | 56.46 ± 1.08***      | 71.96 ± 0.71                | 60.62 ± 0.79***##    |
| FS (%)                | 42.72 ± 0.37       | 33.57 ± 0.53***      | 41.85 ± 0.72                | 36.11 ± 0.56***##    |
| HR (bpm)              | 530 ± 10.37        | 513 ± 2.72           | 515 ± 10.41                 | 508 ± 4.88           |
| SV (μl)               | 33.58 ± 1.89       | 25.72 ± 2.04**       | 32.11 ± 2.49                | 30.33 ± 0.83#        |
| Volume, diastole (μl) | 51.39 ± 3.25       | 78.84 ± 4.64***      | 50.55 ± 4.27                | 59.44 ± 2.39###      |
| Volume, systole (μl)  | 14.59 ± 0.76       | 38.93 ± 4.88***      | 14.05 ± 1.02                | 21.38 ± 0.73***##    |
| LVAW, diastole (mm)   | 0.78 ± 0.05        | 1.21 ± 0.03***       | 0.74 ± 0.02                 | 0.88 ± 0.03***##     |
| LVAW, systole (mm)    | 1.27 ± 0.03        | 1.93 ± 0.07***       | 1.23 ± 0.04                 | 1.57 ± 0.08***##     |
| LVID, diastole (mm)   | 2.47 ± 0.05        | 3.27 ± 0.09***       | 2.54 ± 0.04                 | 2.82 ± 0.06***##     |
| LVID, systole (mm)    | 1.58 ± 0.03        | 2.33 ± 0.04***       | 1.55 ± 0.07                 | 1.89 ± 0.03***##     |
| LVPW, diastole (mm)   | 0.52 ± 0.02        | 0.87 ± 0.06***       | 0.55 ± 0.03                 | 0.63 ± 0.04##        |
| LVPW, systole (mm)    | 0.71 ± 0.04        | 1.53 ± 0.03***       | 0.79 ± 0.08                 | 1.17 ± 0.09***##     |
| Morphometric data     | Vehicle (n=12)     | Isoproterenol (n=12) | Vehicle (n=12)              | Isoproterenol (n=12) |
| HW/BW (mg/g)          | 4.77 ± 0.21        | 6.96 ± 0.16***       | 4.95 ± 0.19                 | 5.80 ± 0.27***##     |
| LVW/BW (mg/g)         | 3.80 ± 0.18        | 5.88 ± 0.19***       | 3.44 ± 0.16                 | 4.29 ± 0.26***##     |

Abbreviations: CO = cardiac output, EF = ejection fraction, FS = fractional shortening, HR = heart rate, SV = stroke volume, LVAW = left ventricular anterior wall thickness, LVID = left ventricular interior diameter, LVPW = left ventricular posterior wall thickness. All values are expressed as mean ± SEM. \* $P$ <0.05, \*\* $P$ <0.01, or \*\*\* $P$ <0.001 vs. vehicle within same group. # $P$ <0.05, ## $P$ <0.01, or ### $P$ <0.001 vs. GRK $\beta$ 1AR TG Isoproterenol. Only parameters, which were statistically significant between groups, are highlighted with red fonts.
